# Supplementary material for: Novel μ3-oxo complexes prepared from Cp*Zr(BH3R)3 (R = H, CH3) and B(C6F5)3 in diethyl ether
Source: Royal Society of Chemistry journal article supplement (doi:10.1039/b719863a), 2008-01-01
Supplement: b719863a.pdf [file b719863a.pdf]

**Novel  $\mu_3$ -oxo Complexes Prepared From Cp\*Zr(BH<sub>3</sub>R) (R = H, CH<sub>3</sub>) and  
B(C<sub>6</sub>F<sub>5</sub>)<sub>3</sub> in Ether**

Fu-Chen Liu\*, Chien-Chan Yang, Shou-Chon Chen, Gene-Hsian Lee, Shie-Ming Peng,

Department of Chemistry, National Dong Hwa University, Hualien 974, Taiwan, R. O. C.

Department of Chemistry, National Taiwan University, Taipei 106, Taiwan, R. O. C.

|            |                                                                                                                                                                                        |     |
|------------|----------------------------------------------------------------------------------------------------------------------------------------------------------------------------------------|-----|
| Table S1.  | Crystal data and structure refinement for Cp*Zr(BH <sub>3</sub> CH <sub>3</sub> ) <sub>3</sub>                                                                                         | 1pg |
| Table S2.  | Atomic coordinates ( x 10 <sup>4</sup> ) and equivalent isotropic displacement parameters (Å <sup>2</sup> x 10 <sup>3</sup> ) for Cp*Zr(BH <sub>3</sub> CH <sub>3</sub> ) <sub>3</sub> | 1pg |
| Table S3.  | Anisotropic displacement parameters (Å <sup>2</sup> x 10 <sup>3</sup> ) for Cp*Zr(BH <sub>3</sub> CH <sub>3</sub> ) <sub>3</sub>                                                       | 1pg |
| Table S4.  | Hydrogen coordinates ( x 10 <sup>4</sup> ) and isotropic displacement parameters (Å <sup>2</sup> x 10 <sup>3</sup> ) for Cp*Zr(BH <sub>3</sub> CH <sub>3</sub> ) <sub>3</sub>          | 1pg |
| Table S5.  | Bond lengths [Å] and angles [°] for Cp*Zr(BH <sub>3</sub> CH <sub>3</sub> ) <sub>3</sub>                                                                                               | 4pg |
| Table S6.  | Crystal data and structure refinement for Cp*Zr(BH <sub>3</sub> Ph) <sub>3</sub>                                                                                                       | 1pg |
| Table S7.  | Atomic coordinates ( x 10 <sup>4</sup> ) and equivalent isotropic displacement parameters (Å <sup>2</sup> x 10 <sup>3</sup> ) for Cp*Zr(BH <sub>3</sub> Ph) <sub>3</sub>               | 1pg |
| Table S8.  | Anisotropic displacement parameters (Å <sup>2</sup> x 10 <sup>3</sup> ) for Cp*Zr(BH <sub>3</sub> Ph) <sub>3</sub>                                                                     | 1pg |
| Table S9.  | Hydrogen coordinates ( x 10 <sup>4</sup> ) and isotropic displacement parameters (Å <sup>2</sup> x 10 <sup>3</sup> ) for Cp*Zr(BH <sub>3</sub> Ph) <sub>3</sub>                        | 1pg |
| Table S10. | Bond lengths [Å] and angles [°] for Cp*Zr(BH <sub>3</sub> Ph) <sub>3</sub>                                                                                                             | 4pg |
| Table S11. | Crystal data and structure refinement for Cp*Zr(BH <sub>4</sub> ) <sub>3</sub>                                                                                                         | 1pg |
| Table S12. | Atomic coordinates ( x 10 <sup>4</sup> ) and equivalent isotropic displacement parameters (Å <sup>2</sup> x 10 <sup>3</sup> ) for Cp*Zr(BH <sub>4</sub> ) <sub>3</sub>                 | 1pg |
| Table S13. | Anisotropic displacement parameters (Å <sup>2</sup> x 10 <sup>3</sup> ) for Cp*Zr(BH <sub>4</sub> ) <sub>3</sub>                                                                       | 1pg |

|            |                                                                                                                                                                                                                                                                                            |     |
|------------|--------------------------------------------------------------------------------------------------------------------------------------------------------------------------------------------------------------------------------------------------------------------------------------------|-----|
| Table S14. | Hydrogen coordinates ( $\times 10^4$ ) and isotropic displacement parameters ( $\text{\AA}^2 \times 10^3$ ) for $\text{Cp}^*\text{Zr}(\text{BH}_4)_3$                                                                                                                                      | 1pg |
| Table S15. | Bond lengths [ $\text{\AA}$ ] and angles [ $^\circ$ ] for $\text{Cp}^*\text{Zr}(\text{BH}_4)_3$                                                                                                                                                                                            | 4pg |
| Table S16. | Crystal data and structure refinement for $[(\mu_3\text{-O})(\mu_2\text{-OC}_2\text{H}_5)_3\{(\text{Cp}^*\text{Zr}(\text{OC}_2\text{H}_5))_2(\text{BCH}_3)\}][\text{HB}(\text{C}_6\text{F}_5)_3]$                                                                                          | 1pg |
| Table S17. | Atomic coordinates ( $\times 10^4$ ) and equivalent isotropic displacement parameters ( $\text{\AA}^2 \times 10^3$ ) for $[(\mu_3\text{-O})(\mu_2\text{-OC}_2\text{H}_5)_3\{(\text{Cp}^*\text{Zr}(\text{OC}_2\text{H}_5))_2(\text{BCH}_3)\}][\text{HB}(\text{C}_6\text{F}_5)_3]$           | 2pg |
| Table S18. | Anisotropic displacement parameters ( $\text{\AA}^2 \times 10^3$ ) for $[(\mu_3\text{-O})(\mu_2\text{-OC}_2\text{H}_5)_3\{(\text{Cp}^*\text{Zr}(\text{OC}_2\text{H}_5))_2(\text{BCH}_3)\}][\text{HB}(\text{C}_6\text{F}_5)_3]$                                                             | 2pg |
| Table S19. | Hydrogen coordinates ( $\times 10^4$ ) and isotropic displacement parameters ( $\text{\AA}^2 \times 10^3$ ) for $[(\mu_3\text{-O})(\mu_2\text{-OC}_2\text{H}_5)_3\{(\text{Cp}^*\text{Zr}(\text{OC}_2\text{H}_5))_2(\text{BCH}_3)\}][\text{HB}(\text{C}_6\text{F}_5)_3]$                    | 2pg |
| Table S20. | Bond lengths [ $\text{\AA}$ ] and angles [ $^\circ$ ] for $[(\mu_3\text{-O})(\mu_2\text{-OC}_2\text{H}_5)_3\{(\text{Cp}^*\text{Zr}(\text{OC}_2\text{H}_5))_2(\text{BCH}_3)\}][\text{HB}(\text{C}_6\text{F}_5)_3]$                                                                          | 4pg |
| Table S21. | Crystal data and structure refinement for $[(\mu_3\text{-O})(\mu_2\text{-OC}_2\text{H}_5)_3\{(\text{Cp}^*\text{Zr}(\text{OC}_2\text{H}_5))_2(\text{BOC}_2\text{H}_5)\}][\text{HB}(\text{C}_6\text{F}_5)_3]$                                                                                | 1pg |
| Table S22. | Atomic coordinates ( $\times 10^4$ ) and equivalent isotropic displacement parameters ( $\text{\AA}^2 \times 10^3$ ) for $[(\mu_3\text{-O})(\mu_2\text{-OC}_2\text{H}_5)_3\{(\text{Cp}^*\text{Zr}(\text{OC}_2\text{H}_5))_2(\text{BOC}_2\text{H}_5)\}][\text{HB}(\text{C}_6\text{F}_5)_3]$ | 2pg |
| Table S23. | Anisotropic displacement parameters ( $\text{\AA}^2 \times 10^3$ ) for $[(\mu_3\text{-O})(\mu_2\text{-OC}_2\text{H}_5)_3\{(\text{Cp}^*\text{Zr}(\text{OC}_2\text{H}_5))_2(\text{BOC}_2\text{H}_5)\}][\text{HB}(\text{C}_6\text{F}_5)_3]$                                                   | 2pg |
| Table S24. | Hydrogen coordinates ( $\times 10^4$ ) and isotropic displacement parameters ( $\text{\AA}^2 \times 10^3$ ) for $[(\mu_3\text{-O})(\mu_2\text{-OC}_2\text{H}_5)_3\{(\text{Cp}^*\text{Zr}(\text{OC}_2\text{H}_5))_2(\text{BOC}_2\text{H}_5)\}][\text{HB}(\text{C}_6\text{F}_5)_3]$          | 2pg |
| Table S25. | Bond lengths [ $\text{\AA}$ ] and angles [ $^\circ$ ] for $[(\mu_3\text{-O})(\mu_2\text{-OC}_2\text{H}_5)_3\{(\text{Cp}^*\text{Zr}(\text{OC}_2\text{H}_5))_2(\text{BOC}_2\text{H}_5)\}][\text{HB}(\text{C}_6\text{F}_5)_3]$                                                                | 5pg |
| Figure S1. | Molecular structure of $\text{Cp}^*\text{Zr}(\text{BH}_3\text{CH}_3)_3$ , showing 30% probability thermal ellipsoids.                                                                                                                                                                      | 1pg |
| Figure S2. | Molecular structure of $\text{Cp}^*\text{Zr}(\text{BH}_4)_3$ , showing 50% probability thermal ellipsoids.                                                                                                                                                                                 | 1pg |

Table S1. Crystal data and structure refinement for Cp\*Zr(BH<sub>3</sub>CH<sub>3</sub>)<sub>3</sub>

|                                   |                                                   |          |
|-----------------------------------|---------------------------------------------------|----------|
| Empirical formula                 | C <sub>13</sub> H <sub>33</sub> B <sub>3</sub> Zr |          |
| Formula weight                    | 313.04                                            |          |
| Temperature                       | 150(2) K                                          |          |
| Wavelength                        | 0.71073 Å                                         |          |
| Crystal system                    | Tetragonal                                        |          |
| Space group                       | P4(3)                                             |          |
| Unit cell dimensions              | a = 7.8250(3) Å                                   | α = 90°. |
|                                   | b = 7.8250(3) Å                                   | β = 90°. |
|                                   | c = 28.7350(11) Å                                 | γ = 90°. |
| Volume                            | 1759.46(12) Å <sup>3</sup>                        |          |
| Z                                 | 4                                                 |          |
| Density (calculated)              | 1.182 Mg/m <sup>3</sup>                           |          |
| Absorption coefficient            | 0.605 mm <sup>-1</sup>                            |          |
| F(000)                            | 664                                               |          |
| Crystal size                      | 0.30 x 0.30 x 0.30 mm <sup>3</sup>                |          |
| Theta range for data collection   | 2.60 to 27.50°.                                   |          |
| Index ranges                      | -10<=h<=10, -10<=k<=10, -37<=l<=37                |          |
| Reflections collected             | 17156                                             |          |
| Independent reflections           | 4028 [R(int) = 0.0366]                            |          |
| Completeness to theta = 27.50°    | 100.0 %                                           |          |
| Absorption correction             | Semi-empirical from equivalents                   |          |
| Max. and min. transmission        | 0.8394 and 0.8394                                 |          |
| Refinement method                 | Full-matrix least-squares on F <sup>2</sup>       |          |
| Data / restraints / parameters    | 4028 / 1 / 181                                    |          |
| Goodness-of-fit on F <sup>2</sup> | 1.052                                             |          |
| Final R indices [I>2sigma(I)]     | R1 = 0.0257, wR2 = 0.0632                         |          |
| R indices (all data)              | R1 = 0.0278, wR2 = 0.0643                         |          |
| Absolute structure parameter      | 0.04(4)                                           |          |
| Largest diff. peak and hole       | 0.303 and -0.240 e.Å <sup>-3</sup>                |          |

$$^a R_1 = \frac{\sum ||F_o| - |F_c||}{\sum |F_o|}$$

$$^b wR_2 = \{\sum w(F_o^2 - F_c^2)^2 / \sum w(F_o^2)^2\}^{1/2}$$

Table S2. Atomic coordinates ( $\times 10^4$ ) and equivalent isotropic displacement parameters ( $\text{\AA}^2 \times 10^3$ ) for  $\text{Cp}^*\text{Zr}(\text{BH}_3\text{CH}_3)_3$

| Atom  | x       | y        | z       | U(eq) <sup>a</sup> |
|-------|---------|----------|---------|--------------------|
| Zr    | 3312(1) | 9079(1)  | 2203(1) | 20(1)              |
| B(1)  | 1099(4) | 7000(4)  | 2285(1) | 33(1)              |
| B(2)  | 5042(4) | 7974(4)  | 1598(1) | 37(1)              |
| B(3)  | 4989(4) | 8757(4)  | 2886(1) | 36(1)              |
| C(1)  | -616(4) | 5945(5)  | 2316(1) | 58(1)              |
| C(2)  | 6122(5) | 7382(6)  | 1159(2) | 63(1)              |
| C(3)  | 6115(5) | 8814(5)  | 3350(1) | 59(1)              |
| C(4)  | 2848(4) | 11606(4) | 1685(1) | 43(1)              |
| C(5)  | 1239(4) | 11126(4) | 1848(1) | 32(1)              |
| C(6)  | 1174(3) | 11419(3) | 2327(1) | 28(1)              |
| C(7)  | 2742(4) | 12078(3) | 2467(1) | 36(1)              |
| C(8)  | 3800(4) | 12200(3) | 2074(1) | 45(1)              |
| C(9)  | 3440(8) | 11658(6) | 1187(2) | 102(2)             |
| C(10) | -246(6) | 10568(6) | 1550(2) | 72(1)              |
| C(11) | -400(5) | 11175(5) | 2627(1) | 59(1)              |
| C(12) | 3151(7) | 12771(5) | 2943(2) | 80(2)              |
| C(13) | 5550(5) | 12976(4) | 2054(3) | 111(3)             |

<sup>a</sup> U(eq) is defined as one third of the trace of the orthogonalized  $U^{\text{ij}}$  tensor.

Table S3. Anisotropic displacement parameters ( $\text{\AA}^2 \times 10^3$ ) for  $\text{Cp}^*\text{Zr}(\text{BH}_3\text{CH}_3)_3$

| Atom  | U11    | U22   | U33    | U23    | U13    | U12    |
|-------|--------|-------|--------|--------|--------|--------|
| Zr    | 19(1)  | 18(1) | 23(1)  | 3(1)   | -3(1)  | 0(1)   |
| B(1)  | 30(1)  | 30(1) | 38(2)  | 6(1)   | -7(1)  | -8(1)  |
| B(2)  | 32(2)  | 34(2) | 46(2)  | -5(2)  | 6(1)   | 5(1)   |
| B(3)  | 38(2)  | 33(2) | 38(2)  | 12(1)  | -14(1) | -8(1)  |
| C(1)  | 45(2)  | 60(2) | 68(3)  | 11(2)  | -5(2)  | -28(2) |
| C(2)  | 55(2)  | 70(3) | 63(2)  | -18(2) | 25(2)  | 3(2)   |
| C(3)  | 73(3)  | 58(2) | 44(2)  | 19(2)  | -35(2) | -27(2) |
| C(4)  | 50(2)  | 40(2) | 39(2)  | 23(1)  | 16(1)  | 25(1)  |
| C(5)  | 32(1)  | 32(1) | 32(1)  | -2(1)  | -9(1)  | 14(1)  |
| C(6)  | 29(1)  | 27(1) | 28(1)  | 2(1)   | 1(1)   | 10(1)  |
| C(7)  | 48(2)  | 19(1) | 42(2)  | -7(1)  | -16(1) | 9(1)   |
| C(8)  | 26(1)  | 17(1) | 91(3)  | 17(1)  | -1(1)  | 2(1)   |
| C(9)  | 165(5) | 91(3) | 51(3)  | 50(2)  | 60(3)  | 77(4)  |
| C(10) | 71(3)  | 73(3) | 73(3)  | -24(2) | -52(2) | 34(2)  |
| C(11) | 62(2)  | 53(2) | 64(2)  | 12(2)  | 32(2)  | 21(2)  |
| C(12) | 127(4) | 47(2) | 67(3)  | -27(2) | -59(3) | 25(2)  |
| C(13) | 32(2)  | 28(2) | 273(9) | 43(3)  | 2(3)   | -5(1)  |

Table S4. Hydrogen coordinates ( $\times 10^4$ ) and isotropic displacement parameters ( $\text{\AA}^2 \times 10^3$ ) for  $\text{Cp}^*\text{Zr}(\text{BH}_3\text{CH}_3)_3$

| Atom   | x        | y        | z        | U(eq) |
|--------|----------|----------|----------|-------|
| H(1A)  | 1320(50) | 8050(40) | 2567(13) | 49    |
| H(1B)  | 1250(50) | 7800(50) | 1928(12) | 49    |
| H(1C)  | 2300(40) | 6330(40) | 2339(12) | 49    |
| H(2A)  | 3640(50) | 8300(50) | 1536(14) | 56    |
| H(2B)  | 5490(50) | 9190(50) | 1779(14) | 56    |
| H(2C)  | 4880(50) | 6880(50) | 1898(14) | 56    |
| H(3A)  | 5570(40) | 9720(50) | 2614(13) | 55    |
| H(3B)  | 3390(40) | 9160(40) | 2908(16) | 55    |
| H(3C)  | 4920(50) | 7540(50) | 2729(13) | 55    |
| H(1D)  | -357     | 4759     | 2399     | 87    |
| H(1E)  | -1198    | 5974     | 2014     | 87    |
| H(1F)  | -1358    | 6448     | 2554     | 87    |
| H(2D)  | 6827     | 6394     | 1244     | 94    |
| H(2E)  | 6861     | 8320     | 1057     | 94    |
| H(2F)  | 5345     | 7064     | 906      | 94    |
| H(3D)  | 6408     | 7647     | 3444     | 88    |
| H(3E)  | 5462     | 9370     | 3599     | 88    |
| H(3F)  | 7166     | 9461     | 3291     | 88    |
| H(9A)  | 3133     | 12761    | 1049     | 153   |
| H(9B)  | 2890     | 10734    | 1012     | 153   |
| H(9C)  | 4683     | 11511    | 1176     | 153   |
| H(10A) | -891     | 11574    | 1448     | 108   |
| H(10B) | -995     | 9816     | 1731     | 108   |
| H(10C) | 183      | 9950     | 1277     | 108   |
| H(11A) | -1063    | 12238    | 2633     | 89    |
| H(11B) | -53      | 10875    | 2944     | 89    |
| H(11C) | -1104    | 10255    | 2497     | 89    |
| H(12A) | 2821     | 13978    | 2959     | 120   |
| H(12B) | 4380     | 12664    | 3002     | 120   |
| H(12C) | 2518     | 12123    | 3179     | 120   |
| H(13A) | 5452     | 14209    | 2001     | 167   |
| H(13B) | 6201     | 12455    | 1800     | 167   |
| H(13C) | 6142     | 12772    | 2350     | 167   |

Table S5. Bond lengths [Å] and angles [°] for Cp\*Zr(BH<sub>3</sub>CH<sub>3</sub>)<sub>3</sub>

|              |            |              |            |
|--------------|------------|--------------|------------|
| Zr-B(2)      | 2.367(3)   | C(2)-H(2D)   | 0.9800     |
| Zr-B(3)      | 2.374(3)   | C(2)-H(2E)   | 0.9800     |
| Zr-B(1)      | 2.387(3)   | C(2)-H(2F)   | 0.9800     |
| Zr-C(5)      | 2.498(2)   | C(3)-H(3D)   | 0.9800     |
| Zr-C(8)      | 2.500(3)   | C(3)-H(3E)   | 0.9800     |
| Zr-C(4)      | 2.502(3)   | C(3)-H(3F)   | 0.9800     |
| Zr-C(6)      | 2.506(2)   | C(4)-C(5)    | 1.395(4)   |
| Zr-C(7)      | 2.507(3)   | C(4)-C(8)    | 1.422(5)   |
| Zr-H(1A)     | 2.04(4)    | C(4)-C(9)    | 1.503(5)   |
| Zr-H(1B)     | 2.06(4)    | C(5)-C(6)    | 1.397(4)   |
| Zr-H(1C)     | 2.33(3)    | C(5)-C(10)   | 1.508(4)   |
| Zr-H(2A)     | 2.02(4)    | C(6)-C(7)    | 1.390(4)   |
| Zr-H(2B)     | 2.10(4)    | C(6)-C(11)   | 1.515(4)   |
| Zr-H(2C)     | 2.29(4)    | C(7)-C(8)    | 1.404(5)   |
| Zr-H(3A)     | 2.18(4)    | C(7)-C(12)   | 1.506(4)   |
| Zr-H(3B)     | 2.03(5)    | C(8)-C(13)   | 1.499(5)   |
| Zr-H(3C)     | 2.31(4)    | C(9)-H(9A)   | 0.9800     |
| B(1)-C(1)    | 1.578(4)   | C(9)-H(9B)   | 0.9800     |
| B(1)-H(1A)   | 1.17(4)    | C(9)-H(9C)   | 0.9800     |
| B(1)-H(1B)   | 1.21(4)    | C(10)-H(10A) | 0.9800     |
| B(1)-H(1C)   | 1.09(3)    | C(10)-H(10B) | 0.9800     |
| B(2)-C(2)    | 1.586(5)   | C(10)-H(10C) | 0.9800     |
| B(2)-H(2A)   | 1.14(4)    | C(11)-H(11A) | 0.9800     |
| B(2)-H(2B)   | 1.14(4)    | C(11)-H(11B) | 0.9800     |
| B(2)-H(2C)   | 1.22(4)    | C(11)-H(11C) | 0.9800     |
| B(3)-C(3)    | 1.600(4)   | C(12)-H(12A) | 0.9800     |
| B(3)-H(3A)   | 1.17(4)    | C(12)-H(12B) | 0.9800     |
| B(3)-H(3B)   | 1.29(3)    | C(12)-H(12C) | 0.9800     |
| B(3)-H(3C)   | 1.06(4)    | C(13)-H(13A) | 0.9800     |
| C(1)-H(1D)   | 0.9800     | C(13)-H(13B) | 0.9800     |
| C(1)-H(1E)   | 0.9800     | C(13)-H(13C) | 0.9800     |
| C(1)-H(1F)   | 0.9800     |              |            |
|              |            |              |            |
| B(2)-Zr-B(3) | 104.61(13) | B(3)-Zr-C(4) | 130.99(12) |
| B(2)-Zr-B(1) | 103.83(12) | B(1)-Zr-C(4) | 119.49(11) |
| B(3)-Zr-B(1) | 104.29(11) | C(5)-Zr-C(4) | 32.41(10)  |
| B(2)-Zr-C(5) | 107.82(11) | C(8)-Zr-C(4) | 33.04(12)  |
| B(3)-Zr-C(5) | 139.85(11) | B(2)-Zr-C(6) | 138.89(11) |
| B(1)-Zr-C(5) | 90.37(10)  | B(3)-Zr-C(6) | 109.17(11) |
| B(2)-Zr-C(8) | 99.22(12)  | B(1)-Zr-C(6) | 89.98(10)  |
| B(3)-Zr-C(8) | 98.13(12)  | C(5)-Zr-C(6) | 32.42(9)   |
| B(1)-Zr-C(8) | 142.31(10) | C(8)-Zr-C(6) | 53.79(9)   |
| C(5)-Zr-C(8) | 53.98(10)  | C(4)-Zr-C(6) | 53.88(9)   |
| B(2)-Zr-C(4) | 86.24(11)  | B(2)-Zr-C(7) | 131.76(12) |

|                |            |                |           |
|----------------|------------|----------------|-----------|
| B(3)-Zr-C(7)   | 86.96(11)  | B(1)-Zr-H(2B)  | 132.5(11) |
| B(1)-Zr-C(7)   | 118.62(11) | C(5)-Zr-H(2B)  | 105.4(10) |
| C(5)-Zr-C(7)   | 53.67(9)   | C(8)-Zr-H(2B)  | 75.5(11)  |
| C(8)-Zr-C(7)   | 32.58(11)  | C(4)-Zr-H(2B)  | 75.0(10)  |
| C(4)-Zr-C(7)   | 54.16(11)  | C(6)-Zr-H(2B)  | 126.6(11) |
| C(6)-Zr-C(7)   | 32.21(9)   | C(7)-Zr-H(2B)  | 106.4(11) |
| B(2)-Zr-H(1A)  | 132.0(10)  | H(1A)-Zr-H(2B) | 159.0(14) |
| B(3)-Zr-H(1A)  | 87.5(10)   | H(1B)-Zr-H(2B) | 115.9(15) |
| B(1)-Zr-H(1A)  | 29.2(10)   | H(1C)-Zr-H(2B) | 114.3(13) |
| C(5)-Zr-H(1A)  | 88.1(10)   | H(2A)-Zr-H(2B) | 50.3(14)  |
| C(8)-Zr-H(1A)  | 125.3(10)  | B(2)-Zr-H(2C)  | 30.4(10)  |
| C(4)-Zr-H(1A)  | 120.4(10)  | B(3)-Zr-H(2C)  | 86.5(10)  |
| C(6)-Zr-H(1A)  | 72.9(10)   | B(1)-Zr-H(2C)  | 85.1(10)  |
| C(7)-Zr-H(1A)  | 94.5(10)   | C(5)-Zr-H(2C)  | 132.5(10) |
| B(2)-Zr-H(1B)  | 89.4(10)   | C(8)-Zr-H(2C)  | 126.6(10) |
| B(3)-Zr-H(1B)  | 134.3(10)  | C(4)-Zr-H(2C)  | 116.4(10) |
| B(1)-Zr-H(1B)  | 30.3(10)   | C(6)-Zr-H(2C)  | 164.3(10) |
| C(5)-Zr-H(1B)  | 69.3(10)   | C(7)-Zr-H(2C)  | 156.3(10) |
| C(8)-Zr-H(1B)  | 122.6(10)  | H(1A)-Zr-H(2C) | 108.0(14) |
| C(4)-Zr-H(1B)  | 92.5(10)   | H(1B)-Zr-H(2C) | 84.8(13)  |
| C(6)-Zr-H(1B)  | 83.5(10)   | H(1C)-Zr-H(2C) | 63.3(13)  |
| C(7)-Zr-H(1B)  | 115.6(10)  | H(2A)-Zr-H(2C) | 49.2(14)  |
| H(1A)-Zr-H(1B) | 53.5(13)   | H(2B)-Zr-H(2C) | 51.1(15)  |
| B(2)-Zr-H(1C)  | 88.8(8)    | B(2)-Zr-H(3A)  | 91.0(10)  |
| B(3)-Zr-H(1C)  | 87.2(8)    | B(3)-Zr-H(3A)  | 29.5(10)  |
| B(1)-Zr-H(1C)  | 26.7(8)    | B(1)-Zr-H(3A)  | 133.6(10) |
| C(5)-Zr-H(1C)  | 116.2(8)   | C(5)-Zr-H(3A)  | 126.9(10) |
| C(8)-Zr-H(1C)  | 168.8(8)   | C(8)-Zr-H(3A)  | 74.5(10)  |
| C(4)-Zr-H(1C)  | 141.5(8)   | C(4)-Zr-H(3A)  | 105.0(10) |
| C(6)-Zr-H(1C)  | 115.2(8)   | C(6)-Zr-H(3A)  | 107.2(10) |
| C(7)-Zr-H(1C)  | 139.0(8)   | C(7)-Zr-H(3A)  | 76.5(10)  |
| H(1A)-Zr-H(1C) | 44.8(12)   | H(1A)-Zr-H(3A) | 115.5(15) |
| H(1B)-Zr-H(1C) | 49.3(13)   | H(1B)-Zr-H(3A) | 162.5(14) |
| B(2)-Zr-H(2A)  | 28.9(11)   | H(1C)-Zr-H(3A) | 113.3(13) |
| B(3)-Zr-H(2A)  | 132.9(11)  | H(2A)-Zr-H(3A) | 118.6(14) |
| B(1)-Zr-H(2A)  | 88.9(10)   | H(2B)-Zr-H(3A) | 69.3(13)  |
| C(5)-Zr-H(2A)  | 83.5(11)   | H(2C)-Zr-H(3A) | 86.8(13)  |
| C(8)-Zr-H(2A)  | 97.7(11)   | B(2)-Zr-H(3B)  | 136.7(9)  |
| C(4)-Zr-H(2A)  | 72.1(11)   | B(3)-Zr-H(3B)  | 32.9(9)   |
| C(6)-Zr-H(2A)  | 115.9(11)  | B(1)-Zr-H(3B)  | 86.8(9)   |
| C(7)-Zr-H(2A)  | 126.1(11)  | C(5)-Zr-H(3B)  | 114.1(9)  |
| H(1A)-Zr-H(2A) | 117.5(14)  | C(8)-Zr-H(3B)  | 96.5(10)  |
| H(1B)-Zr-H(2A) | 65.8(14)   | C(4)-Zr-H(3B)  | 125.0(10) |
| H(1C)-Zr-H(2A) | 85.7(14)   | C(6)-Zr-H(3B)  | 81.7(9)   |
| B(2)-Zr-H(2B)  | 28.8(11)   | C(7)-Zr-H(3B)  | 70.9(10)  |
| B(3)-Zr-H(2B)  | 92.0(11)   | H(1A)-Zr-H(3B) | 61.6(13)  |



|                  |           |                  |            |
|------------------|-----------|------------------|------------|
| H(1B)-Zr-H(3B)   | 115.0(13) | Zr-B(3)-H(3B)    | 59(2)      |
| H(1C)-Zr-H(3B)   | 82.6(12)  | H(3A)-B(3)-H(3B) | 105(2)     |
| H(2A)-Zr-H(3B)   | 161.9(15) | C(3)-B(3)-H(3C)  | 114(2)     |
| H(2B)-Zr-H(3B)   | 123.6(14) | Zr-B(3)-H(3C)    | 73(2)      |
| H(2C)-Zr-H(3B)   | 112.9(14) | H(3A)-B(3)-H(3C) | 108(3)     |
| H(3A)-Zr-H(3B)   | 55.0(14)  | H(3B)-B(3)-H(3C) | 101(2)     |
| B(2)-Zr-H(3C)    | 88.8(9)   | B(1)-C(1)-H(1D)  | 109.5      |
| B(3)-Zr-H(3C)    | 26.0(10)  | B(1)-C(1)-H(1E)  | 109.5      |
| B(1)-Zr-H(3C)    | 88.5(10)  | H(1D)-C(1)-H(1E) | 109.5      |
| C(5)-Zr-H(3C)    | 163.1(9)  | B(1)-C(1)-H(1F)  | 109.5      |
| C(8)-Zr-H(3C)    | 121.6(10) | H(1D)-C(1)-H(1F) | 109.5      |
| C(4)-Zr-H(3C)    | 151.9(10) | H(1E)-C(1)-H(1F) | 109.5      |
| C(6)-Zr-H(3C)    | 130.7(9)  | B(2)-C(2)-H(2D)  | 109.5      |
| C(7)-Zr-H(3C)    | 112.8(10) | B(2)-C(2)-H(2E)  | 109.5      |
| H(1A)-Zr-H(3C)   | 82.7(13)  | H(2D)-C(2)-H(2E) | 109.5      |
| H(1B)-Zr-H(3C)   | 115.1(15) | B(2)-C(2)-H(2F)  | 109.5      |
| H(1C)-Zr-H(3C)   | 65.9(13)  | H(2D)-C(2)-H(2F) | 109.5      |
| H(2A)-Zr-H(3C)   | 113.3(15) | H(2E)-C(2)-H(2F) | 109.5      |
| H(2B)-Zr-H(3C)   | 87.6(13)  | B(3)-C(3)-H(3D)  | 109.5      |
| H(2C)-Zr-H(3C)   | 64.2(14)  | B(3)-C(3)-H(3E)  | 109.5      |
| H(3A)-Zr-H(3C)   | 47.4(15)  | H(3D)-C(3)-H(3E) | 109.5      |
| H(3B)-Zr-H(3C)   | 49.0(12)  | B(3)-C(3)-H(3F)  | 109.5      |
| C(1)-B(1)-Zr     | 168.2(2)  | H(3D)-C(3)-H(3F) | 109.5      |
| C(1)-B(1)-H(1A)  | 117.0(18) | H(3E)-C(3)-H(3F) | 109.5      |
| Zr-B(1)-H(1A)    | 58.8(18)  | C(5)-C(4)-C(8)   | 107.2(3)   |
| C(1)-B(1)-H(1B)  | 113.5(17) | C(5)-C(4)-C(9)   | 127.3(4)   |
| Zr-B(1)-H(1B)    | 59.6(17)  | C(8)-C(4)-C(9)   | 125.3(4)   |
| H(1A)-B(1)-H(1B) | 102(2)    | C(5)-C(4)-Zr     | 73.61(15)  |
| C(1)-B(1)-H(1C)  | 118.3(18) | C(8)-C(4)-Zr     | 73.39(15)  |
| Zr-B(1)-H(1C)    | 73.6(18)  | C(9)-C(4)-Zr     | 122.8(2)   |
| H(1A)-B(1)-H(1C) | 97(2)     | C(4)-C(5)-C(6)   | 108.7(3)   |
| H(1B)-B(1)-H(1C) | 107(3)    | C(4)-C(5)-C(10)  | 125.6(3)   |
| C(2)-B(2)-Zr     | 174.2(3)  | C(6)-C(5)-C(10)  | 125.4(3)   |
| C(2)-B(2)-H(2A)  | 117(2)    | C(4)-C(5)-Zr     | 73.98(15)  |
| Zr-B(2)-H(2A)    | 59(2)     | C(6)-C(5)-Zr     | 74.12(15)  |
| C(2)-B(2)-H(2B)  | 116.2(19) | C(10)-C(5)-Zr    | 123.1(2)   |
| Zr-B(2)-H(2B)    | 62.4(19)  | C(7)-C(6)-C(5)   | 108.3(3)   |
| H(2A)-B(2)-H(2B) | 100(3)    | C(7)-C(6)-C(11)  | 126.9(3)   |
| C(2)-B(2)-H(2C)  | 114.1(18) | C(5)-C(6)-C(11)  | 124.7(3)   |
| Zr-B(2)-H(2C)    | 71.4(18)  | C(7)-C(6)-Zr     | 73.92(14)  |
| H(2A)-B(2)-H(2C) | 100(3)    | C(5)-C(6)-Zr     | 73.46(15)  |
| H(2B)-B(2)-H(2C) | 107(3)    | C(11)-C(6)-Zr    | 122.13(19) |
| C(3)-B(3)-Zr     | 172.3(3)  | C(6)-C(7)-C(8)   | 108.2(3)   |
| C(3)-B(3)-H(3A)  | 108.9(18) | C(6)-C(7)-C(12)  | 125.7(3)   |
| Zr-B(3)-H(3A)    | 66.2(18)  | C(8)-C(7)-C(12)  | 125.6(3)   |
| C(3)-B(3)-H(3B)  | 119(2)    | C(6)-C(7)-Zr     | 73.87(14)  |

Supplementary Material (ESI) for Dalton Transactions  
This journal is (c) The Royal Society of Chemistry 2008

|                     |           |                     |       |
|---------------------|-----------|---------------------|-------|
| C(8)-C(7)-Zr        | 73.44(16) | H(10B)-C(10)-H(10C) | 109.5 |
| C(12)-C(7)-Zr       | 125.1(2)  | C(6)-C(11)-H(11A)   | 109.5 |
| C(7)-C(8)-C(4)      | 107.6(2)  | C(6)-C(11)-H(11B)   | 109.5 |
| C(7)-C(8)-C(13)     | 126.6(4)  | H(11A)-C(11)-H(11B) | 109.5 |
| C(4)-C(8)-C(13)     | 125.6(4)  | C(6)-C(11)-H(11C)   | 109.5 |
| C(7)-C(8)-Zr        | 73.98(15) | H(11A)-C(11)-H(11C) | 109.5 |
| C(4)-C(8)-Zr        | 73.57(16) | H(11B)-C(11)-H(11C) | 109.5 |
| C(13)-C(8)-Zr       | 122.8(2)  | C(7)-C(12)-H(12A)   | 109.5 |
| C(4)-C(9)-H(9A)     | 109.5     | C(7)-C(12)-H(12B)   | 109.5 |
| C(4)-C(9)-H(9B)     | 109.5     | H(12A)-C(12)-H(12B) | 109.5 |
| H(9A)-C(9)-H(9B)    | 109.5     | C(7)-C(12)-H(12C)   | 109.5 |
| C(4)-C(9)-H(9C)     | 109.5     | H(12A)-C(12)-H(12C) | 109.5 |
| H(9A)-C(9)-H(9C)    | 109.5     | H(12B)-C(12)-H(12C) | 109.5 |
| H(9B)-C(9)-H(9C)    | 109.5     | C(8)-C(13)-H(13A)   | 109.5 |
| C(5)-C(10)-H(10A)   | 109.5     | C(8)-C(13)-H(13B)   | 109.5 |
| C(5)-C(10)-H(10B)   | 109.5     | H(13A)-C(13)-H(13B) | 109.5 |
| H(10A)-C(10)-H(10B) | 109.5     | C(8)-C(13)-H(13C)   | 109.5 |
| C(5)-C(10)-H(10C)   | 109.5     | H(13A)-C(13)-H(13C) | 109.5 |
| H(10A)-C(10)-H(10C) | 109.5     | H(13B)-C(13)-H(13C) | 109.5 |

---

Symmetry transformations used to generate equivalent atoms:

Table S6. Crystal data and structure refinement for Cp\*Zr(BH<sub>3</sub>Ph)<sub>3</sub>

|                                   |                                                   |                  |
|-----------------------------------|---------------------------------------------------|------------------|
| Empirical formula                 | C <sub>28</sub> H <sub>39</sub> B <sub>3</sub> Zr |                  |
| Formula weight                    | 499.24                                            |                  |
| Temperature                       | 150(2) K                                          |                  |
| Wavelength                        | 0.71073 Å                                         |                  |
| Crystal system                    | Monoclinic                                        |                  |
| Space group                       | P2(1)/n                                           |                  |
| Unit cell dimensions              | a = 8.8868(1) Å                                   | α = 90°.         |
|                                   | b = 14.7203(2) Å                                  | β = 91.1669(5)°. |
|                                   | c = 20.4718(3) Å                                  | γ = 90°.         |
| Volume                            | 2677.49(6) Å <sup>3</sup>                         |                  |
| Z                                 | 4                                                 |                  |
| Density (calculated)              | 1.238 Mg/m <sup>3</sup>                           |                  |
| Absorption coefficient            | 0.424 mm <sup>-1</sup>                            |                  |
| F(000)                            | 1048                                              |                  |
| Crystal size                      | 0.25 x 0.25 x 0.20 mm <sup>3</sup>                |                  |
| Theta range for data collection   | 1.70 to 27.50°.                                   |                  |
| Index ranges                      | -11<=h<=11, -19<=k<=18, -26<=l<=26                |                  |
| Reflections collected             | 20179                                             |                  |
| Independent reflections           | 6152 [R(int) = 0.0712]                            |                  |
| Completeness to theta = 27.50°    | 100.0 %                                           |                  |
| Absorption correction             | Semi-empirical from equivalents                   |                  |
| Max. and min. transmission        | 0.940 and 0.867                                   |                  |
| Refinement method                 | Full-matrix least-squares on F <sup>2</sup>       |                  |
| Data / restraints / parameters    | 6152 / 0 / 326                                    |                  |
| Goodness-of-fit on F <sup>2</sup> | 1.077                                             |                  |
| Final R indices [I>2sigma(I)]     | R1 = 0.0410, wR2 = 0.0861                         |                  |
| R indices (all data)              | R1 = 0.0847, wR2 = 0.1152                         |                  |
| Extinction coefficient            | 0.0086(7)                                         |                  |
| Largest diff. peak and hole       | 0.791 and -0.663 e.Å <sup>-3</sup>                |                  |

$$^a R_1 = \frac{\sum ||F_o| - |F_c||}{\sum |F_o|}$$

$$^b wR_2 = \{\sum w(F_o^2 - F_c^2)^2 / \sum w(F_o^2)^2\}^{1/2}$$

Table S7. Atomic coordinates ( $\times 10^4$ ) and equivalent isotropic displacement parameters ( $\text{\AA}^2 \times 10^3$ ) for  $\text{Cp}^*\text{Zr}(\text{BH}_3\text{Ph})_3$

| Atom  | x        | y       | z       | U(eq) <sup>a</sup> |
|-------|----------|---------|---------|--------------------|
| Zr    | 8874(1)  | 2967(1) | 2995(1) | 22(1)              |
| B(1)  | 10909(4) | 4015(2) | 3216(2) | 29(1)              |
| B(2)  | 9962(4)  | 1540(2) | 3271(2) | 27(1)              |
| B(3)  | 8611(4)  | 2942(2) | 1831(2) | 28(1)              |
| C(1)  | 11897(3) | 4813(2) | 3501(1) | 30(1)              |
| C(2)  | 11485(4) | 5719(2) | 3421(2) | 42(1)              |
| C(3)  | 12348(5) | 6427(3) | 3665(2) | 53(1)              |
| C(4)  | 13647(4) | 6249(3) | 4007(2) | 48(1)              |
| C(5)  | 14088(4) | 5366(3) | 4110(2) | 47(1)              |
| C(6)  | 13219(4) | 4650(2) | 3855(2) | 38(1)              |
| C(7)  | 10662(3) | 623(2)  | 3518(1) | 25(1)              |
| C(8)  | 12034(3) | 329(2)  | 3284(2) | 30(1)              |
| C(9)  | 12748(4) | -448(2) | 3519(2) | 34(1)              |
| C(10) | 12074(4) | -951(2) | 3996(2) | 38(1)              |
| C(11) | 10688(4) | -693(2) | 4232(2) | 36(1)              |
| C(12) | 9997(4)  | 88(2)   | 3995(2) | 32(1)              |
| C(13) | 8186(3)  | 2937(2) | 1077(1) | 28(1)              |
| C(14) | 7458(4)  | 2200(2) | 786(2)  | 40(1)              |
| C(15) | 7149(4)  | 2168(2) | 120(2)  | 45(1)              |
| C(16) | 7538(4)  | 2885(2) | -272(2) | 44(1)              |
| C(17) | 8226(4)  | 3634(2) | 3(2)    | 43(1)              |
| C(18) | 8549(4)  | 3661(2) | 664(2)  | 36(1)              |
| C(19) | 7222(3)  | 2896(2) | 3970(1) | 27(1)              |
| C(20) | 7510(3)  | 3831(2) | 3862(1) | 26(1)              |
| C(21) | 6846(3)  | 4078(2) | 3246(1) | 28(1)              |
| C(22) | 6115(3)  | 3295(2) | 2987(1) | 29(1)              |
| C(23) | 6361(3)  | 2562(2) | 3426(1) | 28(1)              |
| C(24) | 7569(4)  | 2361(2) | 4583(2) | 38(1)              |
| C(25) | 8270(4)  | 4467(2) | 4340(2) | 36(1)              |
| C(26) | 6812(4)  | 5004(2) | 2941(2) | 37(1)              |
| C(27) | 5112(4)  | 3278(2) | 2386(2) | 40(1)              |
| C(28) | 5663(4)  | 1626(2) | 3373(2) | 42(1)              |

<sup>a</sup> U(eq) is defined as one third of the trace of the orthogonalized  $U_{ij}$  tensor.

Table S8. Anisotropic displacement parameters ( $\text{\AA}^2 \times 10^3$ ) for  $\text{Cp}^*\text{Zr}(\text{BH}_3\text{Ph})_3$

| Atom  | U11   | U22   | U33   | U23    | U13    | U12    |
|-------|-------|-------|-------|--------|--------|--------|
| Zr    | 26(1) | 19(1) | 21(1) | 1(1)   | -1(1)  | 2(1)   |
| B(1)  | 30(2) | 28(2) | 30(2) | 1(2)   | 2(2)   | 1(2)   |
| B(2)  | 29(2) | 23(2) | 29(2) | -2(2)  | -4(2)  | 3(2)   |
| B(3)  | 33(2) | 28(2) | 22(2) | 1(2)   | -1(2)  | -1(2)  |
| C(1)  | 33(2) | 29(2) | 27(2) | -2(1)  | 5(1)   | -2(1)  |
| C(2)  | 49(2) | 30(2) | 48(2) | -2(2)  | -10(2) | -5(2)  |
| C(3)  | 69(3) | 36(2) | 53(2) | -6(2)  | -3(2)  | -11(2) |
| C(4)  | 53(2) | 48(2) | 45(2) | -17(2) | 12(2)  | -21(2) |
| C(5)  | 30(2) | 70(3) | 41(2) | -13(2) | 0(2)   | -10(2) |
| C(6)  | 34(2) | 43(2) | 38(2) | -3(2)  | 4(2)   | -2(2)  |
| C(7)  | 30(2) | 22(2) | 23(2) | -4(1)  | -5(1)  | 1(1)   |
| C(8)  | 35(2) | 29(2) | 26(2) | -3(1)  | -4(1)  | 0(1)   |
| C(9)  | 36(2) | 34(2) | 33(2) | -7(2)  | -6(1)  | 10(1)  |
| C(10) | 56(2) | 29(2) | 30(2) | -1(1)  | -13(2) | 12(2)  |
| C(11) | 57(2) | 26(2) | 25(2) | 3(1)   | -2(2)  | 1(2)   |
| C(12) | 40(2) | 27(2) | 28(2) | -1(1)  | 2(1)   | 4(1)   |
| C(13) | 28(2) | 31(2) | 25(2) | 1(1)   | 1(1)   | 6(1)   |
| C(14) | 51(2) | 37(2) | 31(2) | 3(1)   | -5(2)  | -1(2)  |
| C(15) | 52(2) | 49(2) | 34(2) | -7(2)  | -11(2) | -7(2)  |
| C(16) | 45(2) | 61(2) | 25(2) | 3(2)   | -7(2)  | 5(2)   |
| C(17) | 50(2) | 49(2) | 28(2) | 12(2)  | 0(2)   | -2(2)  |
| C(18) | 38(2) | 40(2) | 31(2) | 3(2)   | -2(1)  | -2(2)  |
| C(19) | 30(2) | 28(2) | 22(2) | 1(1)   | 4(1)   | 3(1)   |
| C(20) | 30(2) | 25(2) | 23(2) | 0(1)   | 4(1)   | 6(1)   |
| C(21) | 29(2) | 28(2) | 28(2) | 3(1)   | 3(1)   | 9(1)   |
| C(22) | 23(2) | 37(2) | 26(2) | 4(1)   | 2(1)   | 5(1)   |
| C(23) | 26(2) | 32(2) | 26(2) | 2(1)   | 6(1)   | 0(1)   |
| C(24) | 52(2) | 37(2) | 26(2) | 9(1)   | 1(2)   | 8(2)   |
| C(25) | 44(2) | 33(2) | 31(2) | -7(1)  | 3(2)   | 6(2)   |
| C(26) | 47(2) | 28(2) | 37(2) | 6(1)   | 5(2)   | 11(2)  |
| C(27) | 29(2) | 55(2) | 37(2) | 3(2)   | -5(2)  | 5(2)   |
| C(28) | 42(2) | 39(2) | 45(2) | 0(2)   | 5(2)   | -12(2) |

Table S9. Hydrogen coordinates ( $\times 10^4$ ) and isotropic displacement parameters ( $\text{\AA}^2 \times 10^3$ ) for Cp\*Zr(BH<sub>3</sub>Ph)<sub>3</sub>

| Atom   | x         | y        | z        | U(eq) |
|--------|-----------|----------|----------|-------|
| H(1A)  | 9880(30)  | 4282(19) | 2928(14) | 29(8) |
| H(1B)  | 10430(30) | 3583(19) | 3589(14) | 28(8) |
| H(1C)  | 11460(30) | 3560(20) | 2880(15) | 40(9) |
| H(2A)  | 8750(30)  | 1407(19) | 3037(12) | 21(7) |
| H(2B)  | 10630(40) | 1900(20) | 2909(16) | 37(9) |
| H(2C)  | 9820(40)  | 2080(20) | 3660(16) | 41(9) |
| H(3A)  | 8380(30)  | 3667(18) | 2095(13) | 22(7) |
| H(3B)  | 9780(40)  | 2820(20) | 1975(15) | 43(9) |
| H(3C)  | 7970(30)  | 2460(20) | 2145(14) | 25(7) |
| H(2D)  | 10575     | 5856     | 3190     | 51    |
| H(3D)  | 12037     | 7038     | 3594     | 63    |
| H(4A)  | 14246     | 6734     | 4173     | 58    |
| H(5A)  | 14984     | 5241     | 4354     | 56    |
| H(6A)  | 13540     | 4042     | 3926     | 46    |
| H(8A)  | 12501     | 672      | 2951     | 36    |
| H(9A)  | 13691     | -629     | 3352     | 41    |
| H(10A) | 12560     | -1478    | 4165     | 46    |
| H(11A) | 10213     | -1049    | 4555     | 43    |
| H(12A) | 9049      | 262      | 4161     | 38    |
| H(14A) | 7165      | 1704     | 1051     | 48    |
| H(15A) | 6668      | 1650     | -66      | 54    |
| H(16A) | 7333      | 2864     | -728     | 53    |
| H(17A) | 8480      | 4135     | -265     | 51    |
| H(18A) | 9029      | 4183     | 844      | 43    |
| H(24A) | 6752      | 2441     | 4892     | 57    |
| H(24B) | 8515      | 2580     | 4782     | 57    |
| H(24C) | 7667      | 1716     | 4474     | 57    |
| H(25A) | 7519      | 4725     | 4631     | 54    |
| H(25B) | 8764      | 4957     | 4102     | 54    |
| H(25C) | 9024      | 4132     | 4600     | 54    |
| H(26A) | 5938      | 5341     | 3097     | 56    |
| H(26B) | 6740      | 4945     | 2464     | 56    |
| H(26C) | 7736      | 5333     | 3062     | 56    |
| H(27A) | 4081      | 3432     | 2505     | 61    |
| H(27B) | 5128      | 2670     | 2192     | 61    |
| H(27C) | 5475      | 3722     | 2068     | 61    |
| H(28A) | 4673      | 1631     | 3576     | 63    |
| H(28B) | 6314      | 1184     | 3598     | 63    |
| H(28C) | 5549      | 1458     | 2912     | 63    |

Table S10. Bond lengths [Å] and angles [°] for Cp\*Zr(BH<sub>3</sub>Ph)<sub>3</sub>

|            |          |              |          |
|------------|----------|--------------|----------|
| Zr-B(2)    | 2.375(3) | C(9)-C(10)   | 1.373(5) |
| Zr-B(3)    | 2.389(3) | C(9)-H(9A)   | 0.9500   |
| Zr-B(1)    | 2.413(4) | C(10)-C(11)  | 1.385(5) |
| Zr-C(23)   | 2.490(3) | C(10)-H(10A) | 0.9500   |
| Zr-C(21)   | 2.495(3) | C(11)-C(12)  | 1.385(4) |
| Zr-C(22)   | 2.498(3) | C(11)-H(11A) | 0.9500   |
| Zr-C(19)   | 2.503(3) | C(12)-H(12A) | 0.9500   |
| Zr-C(20)   | 2.515(3) | C(13)-C(14)  | 1.391(4) |
| Zr-H(1A)   | 2.14(3)  | C(13)-C(18)  | 1.402(4) |
| Zr-H(1B)   | 2.04(3)  | C(14)-C(15)  | 1.386(5) |
| Zr-H(2A)   | 2.30(3)  | C(14)-H(14A) | 0.9500   |
| Zr-H(2B)   | 2.22(3)  | C(15)-C(16)  | 1.373(5) |
| Zr-H(2C)   | 2.05(3)  | C(15)-H(15A) | 0.9500   |
| Zr-H(3A)   | 2.15(3)  | C(16)-C(17)  | 1.375(5) |
| Zr-H(3B)   | 2.26(3)  | C(16)-H(16A) | 0.9500   |
| Zr-H(3C)   | 2.04(3)  | C(17)-C(18)  | 1.378(4) |
| B(1)-C(1)  | 1.572(4) | C(17)-H(17A) | 0.9500   |
| B(1)-H(1A) | 1.15(3)  | C(18)-H(18A) | 0.9500   |
| B(1)-H(1B) | 1.09(3)  | C(19)-C(20)  | 1.419(4) |
| B(1)-H(1C) | 1.08(3)  | C(19)-C(23)  | 1.425(4) |
| B(2)-C(7)  | 1.567(4) | C(19)-C(24)  | 1.508(4) |
| B(2)-H(2A) | 1.18(2)  | C(20)-C(21)  | 1.428(4) |
| B(2)-H(2B) | 1.09(3)  | C(20)-C(25)  | 1.505(4) |
| B(2)-H(2C) | 1.14(3)  | C(21)-C(22)  | 1.420(4) |
| B(3)-C(13) | 1.583(4) | C(21)-C(26)  | 1.500(4) |
| B(3)-H(3A) | 1.22(3)  | C(22)-C(23)  | 1.419(4) |
| B(3)-H(3B) | 1.09(3)  | C(22)-C(27)  | 1.505(4) |
| B(3)-H(3C) | 1.12(3)  | C(23)-C(28)  | 1.514(4) |
| C(1)-C(6)  | 1.390(4) | C(24)-H(24A) | 0.9800   |
| C(1)-C(2)  | 1.392(4) | C(24)-H(24B) | 0.9800   |
| C(2)-C(3)  | 1.381(5) | C(24)-H(24C) | 0.9800   |
| C(2)-H(2D) | 0.9500   | C(25)-H(25A) | 0.9800   |
| C(3)-C(4)  | 1.363(5) | C(25)-H(25B) | 0.9800   |
| C(3)-H(3D) | 0.9500   | C(25)-H(25C) | 0.9800   |
| C(4)-C(5)  | 1.372(5) | C(26)-H(26A) | 0.9800   |
| C(4)-H(4A) | 0.9500   | C(26)-H(26B) | 0.9800   |
| C(5)-C(6)  | 1.401(4) | C(26)-H(26C) | 0.9800   |
| C(5)-H(5A) | 0.9500   | C(27)-H(27A) | 0.9800   |
| C(6)-H(6A) | 0.9500   | C(27)-H(27B) | 0.9800   |
| C(7)-C(8)  | 1.388(4) | C(27)-H(27C) | 0.9800   |
| C(7)-C(12) | 1.395(4) | C(28)-H(28A) | 0.9800   |
| C(8)-C(9)  | 1.390(4) | C(28)-H(28B) | 0.9800   |
| C(8)-H(8A) | 0.9500   | C(28)-H(28C) | 0.9800   |

|                |            |                |           |
|----------------|------------|----------------|-----------|
| B(2)-Zr-B(3)   | 104.75(12) | B(3)-Zr-H(2A)  | 91.1(6)   |
| B(2)-Zr-B(1)   | 102.75(12) | B(1)-Zr-H(2A)  | 131.8(6)  |
| B(3)-Zr-B(1)   | 104.72(13) | C(23)-Zr-H(2A) | 72.9(6)   |
| B(2)-Zr-C(23)  | 93.90(11)  | C(21)-Zr-H(2A) | 127.8(6)  |
| B(3)-Zr-C(23)  | 106.24(11) | C(22)-Zr-H(2A) | 98.5(6)   |
| B(1)-Zr-C(23)  | 139.53(11) | C(19)-Zr-H(2A) | 84.2(6)   |
| B(2)-Zr-C(21)  | 145.40(11) | C(20)-Zr-H(2A) | 117.1(6)  |
| B(3)-Zr-C(21)  | 99.14(11)  | H(1A)-Zr-H(2A) | 157.8(10) |
| B(1)-Zr-C(21)  | 94.82(11)  | H(1B)-Zr-H(2A) | 117.0(10) |
| C(23)-Zr-C(21) | 55.06(10)  | B(2)-Zr-H(2B)  | 27.2(8)   |
| B(2)-Zr-C(22)  | 124.58(11) | B(3)-Zr-H(2B)  | 88.0(8)   |
| B(3)-Zr-C(22)  | 85.43(11)  | B(1)-Zr-H(2B)  | 86.8(8)   |
| B(1)-Zr-C(22)  | 127.52(11) | C(23)-Zr-H(2B) | 119.6(8)  |
| C(23)-Zr-C(22) | 33.05(10)  | C(21)-Zr-H(2B) | 172.1(9)  |
| C(21)-Zr-C(22) | 33.04(10)  | C(22)-Zr-H(2B) | 145.6(8)  |
| B(2)-Zr-C(19)  | 90.92(11)  | C(19)-Zr-H(2B) | 117.2(9)  |
| B(3)-Zr-C(19)  | 138.36(11) | C(20)-Zr-H(2B) | 139.7(8)  |
| B(1)-Zr-C(19)  | 109.08(11) | H(1A)-Zr-H(2B) | 109.9(11) |
| C(23)-Zr-C(19) | 33.17(9)   | H(1B)-Zr-H(2B) | 83.9(11)  |
| C(21)-Zr-C(19) | 54.96(9)   | H(2A)-Zr-H(2B) | 47.9(10)  |
| C(22)-Zr-C(19) | 54.72(9)   | B(2)-Zr-H(2C)  | 28.5(9)   |
| B(2)-Zr-C(20)  | 118.64(11) | B(3)-Zr-H(2C)  | 133.0(9)  |
| B(3)-Zr-C(20)  | 132.26(11) | B(1)-Zr-H(2C)  | 89.3(9)   |
| B(1)-Zr-C(20)  | 85.10(11)  | C(23)-Zr-H(2C) | 88.3(9)   |
| C(23)-Zr-C(20) | 54.71(10)  | C(21)-Zr-H(2C) | 124.5(9)  |
| C(21)-Zr-C(20) | 33.13(9)   | C(22)-Zr-H(2C) | 121.0(9)  |
| C(22)-Zr-C(20) | 54.54(9)   | C(19)-Zr-H(2C) | 71.5(9)   |
| C(19)-Zr-C(20) | 32.84(9)   | C(20)-Zr-H(2C) | 92.8(9)   |
| B(2)-Zr-H(1A)  | 130.3(8)   | H(1A)-Zr-H(2C) | 116.9(11) |
| B(3)-Zr-H(1A)  | 89.0(8)    | H(1B)-Zr-H(2C) | 67.9(12)  |
| B(1)-Zr-H(1A)  | 28.4(8)    | H(2A)-Zr-H(2C) | 50.1(10)  |
| C(23)-Zr-H(1A) | 128.2(8)   | H(2B)-Zr-H(2C) | 47.6(12)  |
| C(21)-Zr-H(1A) | 74.0(8)    | B(2)-Zr-H(3A)  | 134.7(7)  |
| C(22)-Zr-H(1A) | 103.6(8)   | B(3)-Zr-H(3A)  | 30.5(7)   |
| C(19)-Zr-H(1A) | 110.0(8)   | B(1)-Zr-H(3A)  | 89.7(7)   |
| C(20)-Zr-H(1A) | 78.2(8)    | C(23)-Zr-H(3A) | 104.4(7)  |
| B(2)-Zr-H(1B)  | 89.1(8)    | C(21)-Zr-H(3A) | 74.0(7)   |
| B(3)-Zr-H(1B)  | 130.8(8)   | C(22)-Zr-H(3A) | 73.5(7)   |
| B(1)-Zr-H(1B)  | 26.6(8)    | C(19)-Zr-H(3A) | 126.2(7)  |
| C(23)-Zr-H(1B) | 119.8(8)   | C(20)-Zr-H(3A) | 105.6(7)  |
| C(21)-Zr-H(1B) | 94.0(8)    | H(1A)-Zr-H(3A) | 65.8(10)  |
| C(22)-Zr-H(1B) | 124.9(8)   | H(1B)-Zr-H(3A) | 115.1(11) |
| C(19)-Zr-H(1B) | 86.8(8)    | H(2A)-Zr-H(3A) | 120.1(9)  |
| C(20)-Zr-H(1B) | 71.6(8)    | H(2B)-Zr-H(3A) | 113.8(11) |
| H(1A)-Zr-H(1B) | 49.9(11)   | H(2C)-Zr-H(3A) | 161.4(12) |
| B(2)-Zr-H(2A)  | 29.2(6)    | B(2)-Zr-H(3B)  | 89.0(8)   |



|                  |           |                    |           |
|------------------|-----------|--------------------|-----------|
| B(3)-Zr-H(3B)    | 27.0(8)   | H(2A)-B(2)-H(2C)   | 107(2)    |
| B(1)-Zr-H(3B)    | 87.3(8)   | H(2B)-B(2)-H(2C)   | 102(2)    |
| C(23)-Zr-H(3B)   | 130.1(8)  | C(13)-B(3)-Zr      | 171.8(2)  |
| C(21)-Zr-H(3B)   | 121.7(8)  | C(13)-B(3)-H(3A)   | 113.5(12) |
| C(22)-Zr-H(3B)   | 112.4(8)  | Zr-B(3)-H(3A)      | 63.7(12)  |
| C(19)-Zr-H(3B)   | 163.2(8)  | C(13)-B(3)-H(3B)   | 118.0(17) |
| C(20)-Zr-H(3B)   | 152.3(8)  | Zr-B(3)-H(3B)      | 70.1(17)  |
| H(1A)-Zr-H(3B)   | 82.5(11)  | H(3A)-B(3)-H(3B)   | 101(2)    |
| H(1B)-Zr-H(3B)   | 110.0(12) | C(13)-B(3)-H(3C)   | 116.2(14) |
| H(2A)-Zr-H(3B)   | 87.5(9)   | Zr-B(3)-H(3C)      | 58.6(14)  |
| H(2B)-Zr-H(3B)   | 66.1(11)  | H(3A)-B(3)-H(3C)   | 102.1(19) |
| H(2C)-Zr-H(3B)   | 113.7(12) | H(3B)-B(3)-H(3C)   | 104(2)    |
| H(3A)-Zr-H(3B)   | 47.7(10)  | C(6)-C(1)-C(2)     | 116.4(3)  |
| B(2)-Zr-H(3C)    | 91.7(8)   | C(6)-C(1)-B(1)     | 121.6(3)  |
| B(3)-Zr-H(3C)    | 28.0(8)   | C(2)-C(1)-B(1)     | 122.0(3)  |
| B(1)-Zr-H(3C)    | 132.4(9)  | C(3)-C(2)-C(1)     | 122.6(3)  |
| C(23)-Zr-H(3C)   | 82.8(8)   | C(3)-C(2)-H(2D)    | 118.7     |
| C(21)-Zr-H(3C)   | 98.2(8)   | C(1)-C(2)-H(2D)    | 118.7     |
| C(22)-Zr-H(3C)   | 72.3(8)   | C(4)-C(3)-C(2)     | 119.9(4)  |
| C(19)-Zr-H(3C)   | 115.9(8)  | C(4)-C(3)-H(3D)    | 120.1     |
| C(20)-Zr-H(3C)   | 126.8(8)  | C(2)-C(3)-H(3D)    | 120.1     |
| H(1A)-Zr-H(3C)   | 115.8(11) | C(3)-C(4)-C(5)     | 119.8(3)  |
| H(1B)-Zr-H(3C)   | 157.3(12) | C(3)-C(4)-H(4A)    | 120.1     |
| H(2A)-Zr-H(3C)   | 69.4(10)  | C(5)-C(4)-H(4A)    | 120.1     |
| H(2B)-Zr-H(3C)   | 86.4(11)  | C(4)-C(5)-C(6)     | 120.1(3)  |
| H(2C)-Zr-H(3C)   | 118.7(12) | C(4)-C(5)-H(5A)    | 119.9     |
| H(3A)-Zr-H(3C)   | 51.4(11)  | C(6)-C(5)-H(5A)    | 119.9     |
| H(3B)-Zr-H(3C)   | 47.3(11)  | C(1)-C(6)-C(5)     | 121.2(3)  |
| C(1)-B(1)-Zr     | 163.4(2)  | C(1)-C(6)-H(6A)    | 119.4     |
| C(1)-B(1)-H(1A)  | 111.6(14) | C(5)-C(6)-H(6A)    | 119.4     |
| Zr-B(1)-H(1A)    | 62.4(14)  | C(8)-C(7)-C(12)    | 117.0(3)  |
| C(1)-B(1)-H(1B)  | 113.6(15) | C(8)-C(7)-B(2)     | 120.2(3)  |
| Zr-B(1)-H(1B)    | 57.0(14)  | C(12)-C(7)-B(2)    | 122.8(3)  |
| H(1A)-B(1)-H(1B) | 104(2)    | C(7)-C(8)-C(9)     | 122.3(3)  |
| C(1)-B(1)-H(1C)  | 116.1(16) | C(7)-C(8)-H(8A)    | 118.8     |
| Zr-B(1)-H(1C)    | 80.4(16)  | C(9)-C(8)-H(8A)    | 118.8     |
| H(1A)-B(1)-H(1C) | 105(2)    | C(10)-C(9)-C(8)    | 119.2(3)  |
| H(1B)-B(1)-H(1C) | 106(2)    | C(10)-C(9)-H(9A)   | 120.4     |
| C(7)-B(2)-Zr     | 174.9(2)  | C(8)-C(9)-H(9A)    | 120.4     |
| C(7)-B(2)-H(2A)  | 109.8(14) | C(9)-C(10)-C(11)   | 120.2(3)  |
| Zr-B(2)-H(2A)    | 71.9(13)  | C(9)-C(10)-H(10A)  | 119.9     |
| C(7)-B(2)-H(2B)  | 114.7(16) | C(11)-C(10)-H(10A) | 119.9     |
| Zr-B(2)-H(2B)    | 68.6(15)  | C(10)-C(11)-C(12)  | 119.8(3)  |
| H(2A)-B(2)-H(2B) | 108(2)    | C(10)-C(11)-H(11A) | 120.1     |
| C(7)-B(2)-H(2C)  | 115.3(16) | C(12)-C(11)-H(11A) | 120.1     |
| Zr-B(2)-H(2C)    | 59.7(15)  | C(11)-C(12)-C(7)   | 121.4(3)  |

Supplementary Material (ESI) for Dalton Transactions  
This journal is (c) The Royal Society of Chemistry 2008

|                    |           |                     |           |
|--------------------|-----------|---------------------|-----------|
| C(11)-C(12)-H(12A) | 119.3     | C(21)-C(22)-C(27)   | 125.3(3)  |
| C(7)-C(12)-H(12A)  | 119.3     | C(23)-C(22)-Zr      | 73.14(16) |
| C(14)-C(13)-C(18)  | 116.5(3)  | C(21)-C(22)-Zr      | 73.33(16) |
| C(14)-C(13)-B(3)   | 121.4(3)  | C(27)-C(22)-Zr      | 124.5(2)  |
| C(18)-C(13)-B(3)   | 122.1(3)  | C(22)-C(23)-C(19)   | 107.9(3)  |
| C(15)-C(14)-C(13)  | 121.9(3)  | C(22)-C(23)-C(28)   | 126.1(3)  |
| C(15)-C(14)-H(14A) | 119.1     | C(19)-C(23)-C(28)   | 125.6(3)  |
| C(13)-C(14)-H(14A) | 119.1     | C(22)-C(23)-Zr      | 73.81(16) |
| C(16)-C(15)-C(14)  | 120.0(3)  | C(19)-C(23)-Zr      | 73.95(16) |
| C(16)-C(15)-H(15A) | 120.0     | C(28)-C(23)-Zr      | 124.2(2)  |
| C(14)-C(15)-H(15A) | 120.0     | C(19)-C(24)-H(24A)  | 109.5     |
| C(15)-C(16)-C(17)  | 119.5(3)  | C(19)-C(24)-H(24B)  | 109.5     |
| C(15)-C(16)-H(16A) | 120.2     | H(24A)-C(24)-H(24B) | 109.5     |
| C(17)-C(16)-H(16A) | 120.2     | C(19)-C(24)-H(24C)  | 109.5     |
| C(16)-C(17)-C(18)  | 120.5(3)  | H(24A)-C(24)-H(24C) | 109.5     |
| C(16)-C(17)-H(17A) | 119.8     | H(24B)-C(24)-H(24C) | 109.5     |
| C(18)-C(17)-H(17A) | 119.8     | C(20)-C(25)-H(25A)  | 109.5     |
| C(17)-C(18)-C(13)  | 121.5(3)  | C(20)-C(25)-H(25B)  | 109.5     |
| C(17)-C(18)-H(18A) | 119.2     | H(25A)-C(25)-H(25B) | 109.5     |
| C(13)-C(18)-H(18A) | 119.2     | C(20)-C(25)-H(25C)  | 109.5     |
| C(20)-C(19)-C(23)  | 107.9(2)  | H(25A)-C(25)-H(25C) | 109.5     |
| C(20)-C(19)-C(24)  | 127.0(3)  | H(25B)-C(25)-H(25C) | 109.5     |
| C(23)-C(19)-C(24)  | 124.6(3)  | C(21)-C(26)-H(26A)  | 109.5     |
| C(20)-C(19)-Zr     | 74.04(16) | C(21)-C(26)-H(26B)  | 109.5     |
| C(23)-C(19)-Zr     | 72.89(16) | H(26A)-C(26)-H(26B) | 109.5     |
| C(24)-C(19)-Zr     | 124.9(2)  | C(21)-C(26)-H(26C)  | 109.5     |
| C(19)-C(20)-C(21)  | 108.2(3)  | H(26A)-C(26)-H(26C) | 109.5     |
| C(19)-C(20)-C(25)  | 125.6(3)  | H(26B)-C(26)-H(26C) | 109.5     |
| C(21)-C(20)-C(25)  | 126.1(3)  | C(22)-C(27)-H(27A)  | 109.5     |
| C(19)-C(20)-Zr     | 73.12(16) | C(22)-C(27)-H(27B)  | 109.5     |
| C(21)-C(20)-Zr     | 72.64(16) | H(27A)-C(27)-H(27B) | 109.5     |
| C(25)-C(20)-Zr     | 123.9(2)  | C(22)-C(27)-H(27C)  | 109.5     |
| C(22)-C(21)-C(20)  | 107.5(3)  | H(27A)-C(27)-H(27C) | 109.5     |
| C(22)-C(21)-C(26)  | 125.2(3)  | H(27B)-C(27)-H(27C) | 109.5     |
| C(20)-C(21)-C(26)  | 127.1(3)  | C(23)-C(28)-H(28A)  | 109.5     |
| C(22)-C(21)-Zr     | 73.62(16) | C(23)-C(28)-H(28B)  | 109.5     |
| C(20)-C(21)-Zr     | 74.23(16) | H(28A)-C(28)-H(28B) | 109.5     |
| C(26)-C(21)-Zr     | 121.3(2)  | C(23)-C(28)-H(28C)  | 109.5     |
| C(23)-C(22)-C(21)  | 108.5(3)  | H(28A)-C(28)-H(28C) | 109.5     |
| C(23)-C(22)-C(27)  | 125.9(3)  | H(28B)-C(28)-H(28C) | 109.5     |

---

Symmetry transformations used to generate equivalent atoms:

Table S11. Crystal data and structure refinement for Cp\*Zr(BH<sub>4</sub>)<sub>3</sub>

|                                   |                                                   |                 |
|-----------------------------------|---------------------------------------------------|-----------------|
| Empirical formula                 | C <sub>10</sub> H <sub>27</sub> B <sub>3</sub> Zr |                 |
| Formula weight                    | 270.97                                            |                 |
| Temperature                       | 150(1) K                                          |                 |
| Wavelength                        | 0.71073 Å                                         |                 |
| Crystal system                    | Triclinic                                         |                 |
| Space group                       | P-1                                               |                 |
| Unit cell dimensions              | a = 7.0619(8) Å                                   | α = 84.077(2)°. |
|                                   | b = 8.4186(9) Å                                   | β = 88.589(2)°. |
|                                   | c = 13.4982(15) Å                                 | γ = 66.427(2)°. |
| Volume                            | 731.47(14) Å <sup>3</sup>                         |                 |
| Z                                 | 2                                                 |                 |
| Density (calculated)              | 1.230 Mg/m <sup>3</sup>                           |                 |
| Absorption coefficient            | 0.717 mm <sup>-1</sup>                            |                 |
| F(000)                            | 284                                               |                 |
| Crystal size                      | 0.20 x 0.20 x 0.10 mm <sup>3</sup>                |                 |
| Theta range for data collection   | 1.52 to 27.50°.                                   |                 |
| Index ranges                      | -9<=h<=9, -10<=k<=10, -17<=l<=17                  |                 |
| Reflections collected             | 9665                                              |                 |
| Independent reflections           | 3345 [R(int) = 0.0351]                            |                 |
| Completeness to theta = 27.50°    | 99.7 %                                            |                 |
| Absorption correction             | Semi-empirical from equivalents                   |                 |
| Max. and min. transmission        | 0.9318 and 0.8699                                 |                 |
| Refinement method                 | Full-matrix least-squares on F <sup>2</sup>       |                 |
| Data / restraints / parameters    | 3345 / 0 / 175                                    |                 |
| Goodness-of-fit on F <sup>2</sup> | 1.155                                             |                 |
| Final R indices [I>2sigma(I)]     | R1 = 0.0364, wR2 = 0.0857                         |                 |
| R indices (all data)              | R1 = 0.0401, wR2 = 0.0873                         |                 |
| Largest diff. peak and hole       | 1.205 and -0.785 e.Å <sup>-3</sup>                |                 |

$$^a R_1 = \frac{\sum ||F_o| - |F_c||}{\sum |F_o|}$$

$$^b wR_2 = \left\{ \frac{\sum w(F_o^2 - F_c^2)^2}{\sum w(F_o^2)^2} \right\}^{1/2}$$

Table S12. Atomic coordinates ( $\times 10^4$ ) and equivalent isotropic displacement parameters ( $\text{\AA}^2 \times 10^3$ ) for  $\text{Cp}^*\text{Zr}(\text{BH}_4)_3$

| Atom  | x        | y        | z       | U(eq) <sup>a</sup> |
|-------|----------|----------|---------|--------------------|
| Zr    | 888(1)   | 8121(1)  | 2513(1) | 19(1)              |
| B(1)  | 3057(5)  | 6033(5)  | 1484(3) | 34(1)              |
| B(2)  | 1499(6)  | 10639(5) | 1980(3) | 35(1)              |
| B(3)  | 2536(6)  | 7188(6)  | 4109(3) | 41(1)              |
| C(1)  | -2001(4) | 7606(3)  | 1775(2) | 21(1)              |
| C(2)  | -2650(4) | 9437(3)  | 1738(2) | 21(1)              |
| C(3)  | -2870(4) | 9886(3)  | 2732(2) | 21(1)              |
| C(4)  | -2364(4) | 8344(3)  | 3381(2) | 22(1)              |
| C(5)  | -1807(4) | 6924(3)  | 2792(2) | 20(1)              |
| C(6)  | -1761(5) | 6579(4)  | 900(2)  | 31(1)              |
| C(7)  | -3242(5) | 10696(4) | 817(2)  | 32(1)              |
| C(8)  | -3772(5) | 11706(4) | 3030(2) | 33(1)              |
| C(9)  | -2576(5) | 8221(4)  | 4494(2) | 32(1)              |
| C(10) | -1334(5) | 5069(4)  | 3176(2) | 33(1)              |

<sup>a</sup> U(eq) is defined as one third of the trace of the orthogonalized  $U_{ij}$  tensor.

Table S13. Anisotropic displacement parameters ( $\text{\AA}^2 \times 10^3$ ) for  $\text{Cp}^*\text{Zr}(\text{BH}_4)_3$

| Atom  | U11   | U22   | U33   | U23    | U13   | U12    |
|-------|-------|-------|-------|--------|-------|--------|
| Zr    | 16(1) | 18(1) | 22(1) | -2(1)  | 2(1)  | -7(1)  |
| B(1)  | 27(2) | 31(2) | 43(2) | -10(2) | 8(1)  | -9(1)  |
| B(2)  | 33(2) | 28(2) | 50(2) | -6(2)  | 13(2) | -18(2) |
| B(3)  | 35(2) | 63(3) | 29(2) | 3(2)   | -7(2) | -26(2) |
| C(1)  | 17(1) | 23(1) | 24(1) | -6(1)  | 1(1)  | -8(1)  |
| C(2)  | 16(1) | 21(1) | 24(1) | 0(1)   | 0(1)  | -7(1)  |
| C(3)  | 17(1) | 19(1) | 26(1) | -5(1)  | 3(1)  | -6(1)  |
| C(4)  | 18(1) | 24(1) | 23(1) | -3(1)  | 3(1)  | -8(1)  |
| C(5)  | 16(1) | 18(1) | 27(1) | -1(1)  | 1(1)  | -6(1)  |
| C(6)  | 33(2) | 34(2) | 30(2) | -14(1) | 2(1)  | -14(1) |
| C(7)  | 33(2) | 32(2) | 28(2) | 6(1)   | -4(1) | -11(1) |
| C(8)  | 32(2) | 22(1) | 44(2) | -13(1) | 5(1)  | -7(1)  |
| C(9)  | 32(2) | 44(2) | 22(1) | -5(1)  | 7(1)  | -15(1) |
| C(10) | 34(2) | 19(1) | 44(2) | 2(1)   | 4(1)  | -11(1) |

Table S14. Hydrogen coordinates ( $\times 10^4$ ) and isotropic displacement parameters ( $\text{\AA}^2 \times 10^3$ ) for  $\text{Cp}^*\text{Zr}(\text{BH}_4)_3$

| Atom   | x        | y         | z        | U(eq)  |
|--------|----------|-----------|----------|--------|
| H(1A)  | 2210(50) | 5580(40)  | 2130(20) | 33(9)  |
| H(1B)  | 3990(60) | 6600(50)  | 1810(30) | 46(10) |
| H(1C)  | 1700(60) | 7360(50)  | 1140(30) | 44(10) |
| H(1D)  | 3800(60) | 5080(50)  | 990(30)  | 45(10) |
| H(2A)  | 780(50)  | 10130(50) | 1440(30) | 43(10) |
| H(2B)  | 2940(60) | 9710(50)  | 2150(30) | 45(10) |
| H(2C)  | 610(60)  | 10670(50) | 2680(30) | 50(11) |
| H(2D)  | 1440(60) | 11940(50) | 1760(30) | 53(11) |
| H(3A)  | 3620(50) | 7340(40)  | 3650(20) | 27(8)  |
| H(3B)  | 1200(60) | 8340(50)  | 3980(30) | 39(9)  |
| H(3C)  | 1960(50) | 6330(50)  | 3810(30) | 39(9)  |
| H(3D)  | 3040(60) | 6770(50)  | 4900(30) | 64(12) |
| H(6A)  | -3092    | 6550      | 739      | 47     |
| H(6B)  | -738     | 5387      | 1066     | 47     |
| H(6C)  | -1298    | 7130      | 324      | 47     |
| H(7A)  | -4707    | 11032     | 658      | 49     |
| H(7B)  | -2402    | 10145     | 261      | 49     |
| H(7C)  | -3006    | 11734     | 930      | 49     |
| H(8A)  | -5283    | 12150     | 3006     | 50     |
| H(8B)  | -3314    | 12456     | 2571     | 50     |
| H(8C)  | -3307    | 11702     | 3709     | 50     |
| H(9A)  | -3984    | 8349      | 4662     | 49     |
| H(9B)  | -2294    | 9148      | 4757     | 49     |
| H(9C)  | -1588    | 7085      | 4788     | 49     |
| H(10A) | -2620    | 4887      | 3229     | 49     |
| H(10B) | -661     | 4812      | 3834     | 49     |
| H(10C) | -410     | 4294      | 2716     | 49     |

Table S15. Bond lengths [Å] and angles [°] for Cp\*Zr(BH<sub>4</sub>)<sub>3</sub>

|              |            |               |            |
|--------------|------------|---------------|------------|
| Zr-B(2)      | 2.366(3)   | B(3)-H(3C)    | 1.07(4)    |
| Zr-B(1)      | 2.369(4)   | B(3)-H(3D)    | 1.11(4)    |
| Zr-B(3)      | 2.378(4)   | C(1)-C(2)     | 1.417(4)   |
| Zr-C(5)      | 2.489(3)   | C(1)-C(5)     | 1.421(4)   |
| Zr-C(3)      | 2.497(2)   | C(1)-C(6)     | 1.501(4)   |
| Zr-C(1)      | 2.498(3)   | C(2)-C(3)     | 1.420(4)   |
| Zr-C(2)      | 2.498(2)   | C(2)-C(7)     | 1.497(4)   |
| Zr-C(4)      | 2.500(3)   | C(3)-C(4)     | 1.411(4)   |
| Zr-H(1A)     | 2.08(3)    | C(3)-C(8)     | 1.500(4)   |
| Zr-H(1B)     | 2.29(4)    | C(4)-C(5)     | 1.421(4)   |
| Zr-H(1C)     | 2.02(3)    | C(4)-C(9)     | 1.503(4)   |
| Zr-H(2A)     | 2.09(4)    | C(5)-C(10)    | 1.498(4)   |
| Zr-H(2B)     | 2.34(4)    | C(6)-H(6A)    | 0.9800     |
| Zr-H(2C)     | 2.11(4)    | C(6)-H(6B)    | 0.9800     |
| Zr-H(3A)     | 2.33(3)    | C(6)-H(6C)    | 0.9800     |
| Zr-H(3B)     | 2.03(3)    | C(7)-H(7A)    | 0.9800     |
| Zr-H(3C)     | 2.13(3)    | C(7)-H(7B)    | 0.9800     |
| B(1)-H(1A)   | 1.16(3)    | C(7)-H(7C)    | 0.9800     |
| B(1)-H(1B)   | 1.08(4)    | C(8)-H(8A)    | 0.9800     |
| B(1)-H(1C)   | 1.20(4)    | C(8)-H(8B)    | 0.9800     |
| B(1)-H(1D)   | 1.06(4)    | C(8)-H(8C)    | 0.9800     |
| B(2)-H(2A)   | 1.11(4)    | C(9)-H(9A)    | 0.9800     |
| B(2)-H(2B)   | 1.02(4)    | C(9)-H(9B)    | 0.9800     |
| B(2)-H(2C)   | 1.12(4)    | C(9)-H(9C)    | 0.9800     |
| B(2)-H(2D)   | 1.09(4)    | C(10)-H(10A)  | 0.9800     |
| B(3)-H(3A)   | 1.02(3)    | C(10)-H(10B)  | 0.9800     |
| B(3)-H(3B)   | 1.05(4)    | C(10)-H(10C)  | 0.9800     |
|              |            |               |            |
| B(2)-Zr-B(1) | 103.26(13) | B(1)-Zr-C(2)  | 107.81(11) |
| B(2)-Zr-B(3) | 103.66(15) | B(3)-Zr-C(2)  | 140.19(12) |
| B(1)-Zr-B(3) | 104.02(15) | C(5)-Zr-C(2)  | 54.81(8)   |
| B(2)-Zr-C(5) | 144.91(11) | C(3)-Zr-C(2)  | 33.03(8)   |
| B(1)-Zr-C(5) | 97.72(11)  | C(1)-Zr-C(2)  | 32.97(8)   |
| B(3)-Zr-C(5) | 98.04(12)  | B(2)-Zr-C(4)  | 121.10(11) |
| B(2)-Zr-C(3) | 91.90(11)  | B(1)-Zr-C(4)  | 130.71(11) |
| B(1)-Zr-C(3) | 139.20(11) | B(3)-Zr-C(4)  | 86.43(11)  |
| B(3)-Zr-C(3) | 108.85(12) | C(5)-Zr-C(4)  | 33.09(8)   |
| C(5)-Zr-C(3) | 54.73(8)   | C(3)-Zr-C(4)  | 32.80(8)   |
| B(2)-Zr-C(1) | 121.03(12) | C(1)-Zr-C(4)  | 54.72(8)   |
| B(1)-Zr-C(1) | 85.49(11)  | C(2)-Zr-C(4)  | 54.62(8)   |
| B(3)-Zr-C(1) | 130.97(12) | B(2)-Zr-H(1A) | 132.2(9)   |
| C(5)-Zr-C(1) | 33.11(8)   | B(1)-Zr-H(1A) | 29.3(9)    |
| C(3)-Zr-C(1) | 54.69(8)   | B(3)-Zr-H(1A) | 90.4(9)    |
| B(2)-Zr-C(2) | 91.76(12)  | C(5)-Zr-H(1A) | 74.0(9)    |

|                |           |                |           |
|----------------|-----------|----------------|-----------|
| C(3)-Zr-H(1A)  | 126.7(9)  | B(2)-Zr-H(2C)  | 28.1(10)  |
| C(1)-Zr-H(1A)  | 74.9(9)   | B(1)-Zr-H(2C)  | 130.8(11) |
| C(2)-Zr-H(1A)  | 106.1(9)  | B(3)-Zr-H(2C)  | 89.1(10)  |
| C(4)-Zr-H(1A)  | 104.9(9)  | C(5)-Zr-H(2C)  | 127.6(10) |
| B(2)-Zr-H(1B)  | 86.0(10)  | C(3)-Zr-H(2C)  | 73.8(10)  |
| B(1)-Zr-H(1B)  | 26.7(10)  | C(1)-Zr-H(2C)  | 120.8(10) |
| B(3)-Zr-H(1B)  | 88.7(9)   | C(2)-Zr-H(2C)  | 87.9(10)  |
| C(5)-Zr-H(1B)  | 122.0(10) | C(4)-Zr-H(2C)  | 96.8(11)  |
| C(3)-Zr-H(1B)  | 162.2(9)  | H(1A)-Zr-H(2C) | 158.2(15) |
| C(1)-Zr-H(1B)  | 111.9(10) | H(1B)-Zr-H(2C) | 109.9(14) |
| C(2)-Zr-H(1B)  | 129.3(9)  | H(1C)-Zr-H(2C) | 114.5(15) |
| C(4)-Zr-H(1B)  | 152.8(10) | H(2A)-Zr-H(2C) | 49.8(14)  |
| H(1A)-Zr-H(1B) | 48.3(13)  | H(2B)-Zr-H(2C) | 44.3(13)  |
| B(2)-Zr-H(1C)  | 87.5(10)  | B(2)-Zr-H(3A)  | 87.6(8)   |
| B(1)-Zr-H(1C)  | 30.5(10)  | B(1)-Zr-H(3A)  | 89.7(8)   |
| B(3)-Zr-H(1C)  | 133.7(11) | B(3)-Zr-H(3A)  | 24.9(8)   |
| C(5)-Zr-H(1C)  | 97.2(10)  | C(5)-Zr-H(3A)  | 120.7(8)  |
| C(3)-Zr-H(1C)  | 115.6(10) | C(3)-Zr-H(3A)  | 129.2(8)  |
| C(1)-Zr-H(1C)  | 71.4(10)  | C(1)-Zr-H(3A)  | 151.4(8)  |
| C(2)-Zr-H(1C)  | 82.6(10)  | C(2)-Zr-H(3A)  | 162.2(8)  |
| C(4)-Zr-H(1C)  | 126.0(10) | C(4)-Zr-H(3A)  | 111.1(8)  |
| H(1A)-Zr-H(1C) | 52.9(13)  | H(1A)-Zr-H(3A) | 87.3(12)  |
| H(1B)-Zr-H(1C) | 46.7(13)  | H(1B)-Zr-H(3A) | 68.4(12)  |
| B(2)-Zr-H(2A)  | 28.1(10)  | H(1C)-Zr-H(3A) | 115.2(13) |
| B(1)-Zr-H(2A)  | 90.1(10)  | H(2A)-Zr-H(3A) | 112.4(13) |
| B(3)-Zr-H(2A)  | 131.4(10) | H(2B)-Zr-H(3A) | 67.4(12)  |
| C(5)-Zr-H(2A)  | 126.2(10) | H(2C)-Zr-H(3A) | 83.1(12)  |
| C(3)-Zr-H(2A)  | 85.9(10)  | B(2)-Zr-H(3B)  | 93.4(10)  |
| C(1)-Zr-H(2A)  | 95.8(10)  | B(1)-Zr-H(3B)  | 130.0(10) |
| C(2)-Zr-H(2A)  | 72.1(10)  | B(3)-Zr-H(3B)  | 26.0(10)  |
| C(4)-Zr-H(2A)  | 118.7(10) | C(5)-Zr-H(3B)  | 94.3(10)  |
| H(1A)-Zr-H(2A) | 118.0(13) | C(3)-Zr-H(3B)  | 85.7(10)  |
| H(1B)-Zr-H(2A) | 84.0(13)  | C(1)-Zr-H(3B)  | 125.0(10) |
| H(1C)-Zr-H(2A) | 65.8(14)  | C(2)-Zr-H(3B)  | 118.6(10) |
| B(2)-Zr-H(2B)  | 25.0(9)   | C(4)-Zr-H(3B)  | 71.1(10)  |
| B(1)-Zr-H(2B)  | 88.1(9)   | H(1A)-Zr-H(3B) | 114.2(13) |
| B(3)-Zr-H(2B)  | 88.5(9)   | H(1B)-Zr-H(3B) | 112.1(14) |
| C(5)-Zr-H(2B)  | 169.9(9)  | H(1C)-Zr-H(3B) | 158.7(15) |
| C(3)-Zr-H(2B)  | 115.8(9)  | H(2A)-Zr-H(3B) | 120.1(14) |
| C(1)-Zr-H(2B)  | 140.3(9)  | H(2B)-Zr-H(3B) | 88.2(13)  |
| C(2)-Zr-H(2B)  | 115.5(9)  | H(2C)-Zr-H(3B) | 70.9(14)  |
| C(4)-Zr-H(2B)  | 140.9(9)  | H(3A)-Zr-H(3B) | 43.7(13)  |
| H(1A)-Zr-H(2B) | 113.9(13) | B(2)-Zr-H(3C)  | 130.2(10) |
| H(1B)-Zr-H(2B) | 65.5(13)  | B(1)-Zr-H(3C)  | 91.6(9)   |
| H(1C)-Zr-H(2B) | 83.6(13)  | B(3)-Zr-H(3C)  | 26.8(10)  |
| H(2A)-Zr-H(2B) | 45.1(13)  | C(5)-Zr-H(3C)  | 76.1(10)  |



|                  |           |                  |            |
|------------------|-----------|------------------|------------|
| C(3)-Zr-H(3C)    | 107.1(9)  | C(5)-C(1)-Zr     | 73.13(14)  |
| C(1)-Zr-H(3C)    | 107.1(10) | C(6)-C(1)-Zr     | 123.66(18) |
| C(2)-Zr-H(3C)    | 128.6(10) | C(1)-C(2)-C(3)   | 107.9(2)   |
| C(4)-Zr-H(3C)    | 76.4(9)   | C(1)-C(2)-C(7)   | 126.0(2)   |
| H(1A)-Zr-H(3C)   | 69.6(13)  | C(3)-C(2)-C(7)   | 125.8(2)   |
| H(1B)-Zr-H(3C)   | 87.4(13)  | C(1)-C(2)-Zr     | 73.51(14)  |
| H(1C)-Zr-H(3C)   | 121.3(14) | C(3)-C(2)-Zr     | 73.46(14)  |
| H(2A)-Zr-H(3C)   | 157.1(15) | C(7)-C(2)-Zr     | 124.26(18) |
| H(2B)-Zr-H(3C)   | 112.1(13) | C(4)-C(3)-C(2)   | 108.2(2)   |
| H(2C)-Zr-H(3C)   | 114.8(14) | C(4)-C(3)-C(8)   | 125.9(2)   |
| H(3A)-Zr-H(3C)   | 44.7(12)  | C(2)-C(3)-C(8)   | 125.4(2)   |
| H(3B)-Zr-H(3C)   | 45.1(13)  | C(4)-C(3)-Zr     | 73.69(14)  |
| Zr-B(1)-H(1A)    | 61.2(16)  | C(2)-C(3)-Zr     | 73.51(14)  |
| Zr-B(1)-H(1B)    | 72(2)     | C(8)-C(3)-Zr     | 125.21(19) |
| H(1A)-B(1)-H(1B) | 107(3)    | C(3)-C(4)-C(5)   | 108.1(2)   |
| Zr-B(1)-H(1C)    | 58.3(17)  | C(3)-C(4)-C(9)   | 126.4(2)   |
| H(1A)-B(1)-H(1C) | 101(2)    | C(5)-C(4)-C(9)   | 125.2(2)   |
| H(1B)-B(1)-H(1C) | 98(3)     | C(3)-C(4)-Zr     | 73.51(14)  |
| Zr-B(1)-H(1D)    | 171(2)    | C(5)-C(4)-Zr     | 73.07(14)  |
| H(1A)-B(1)-H(1D) | 114(3)    | C(9)-C(4)-Zr     | 123.91(18) |
| H(1B)-B(1)-H(1D) | 117(3)    | C(4)-C(5)-C(1)   | 107.8(2)   |
| H(1C)-B(1)-H(1D) | 117(3)    | C(4)-C(5)-C(10)  | 125.8(2)   |
| Zr-B(2)-H(2A)    | 62.0(18)  | C(1)-C(5)-C(10)  | 126.0(2)   |
| Zr-B(2)-H(2B)    | 76(2)     | C(4)-C(5)-Zr     | 73.84(15)  |
| H(2A)-B(2)-H(2B) | 107(3)    | C(1)-C(5)-Zr     | 73.76(14)  |
| Zr-B(2)-H(2C)    | 63(2)     | C(10)-C(5)-Zr    | 123.37(18) |
| H(2A)-B(2)-H(2C) | 105(3)    | C(1)-C(6)-H(6A)  | 109.5      |
| H(2B)-B(2)-H(2C) | 105(3)    | C(1)-C(6)-H(6B)  | 109.5      |
| Zr-B(2)-H(2D)    | 168(2)    | H(6A)-C(6)-H(6B) | 109.5      |
| H(2A)-B(2)-H(2D) | 115(3)    | C(1)-C(6)-H(6C)  | 109.5      |
| H(2B)-B(2)-H(2D) | 115(3)    | H(6A)-C(6)-H(6C) | 109.5      |
| H(2C)-B(2)-H(2D) | 109(3)    | H(6B)-C(6)-H(6C) | 109.5      |
| Zr-B(3)-H(3A)    | 74.7(18)  | C(2)-C(7)-H(7A)  | 109.5      |
| Zr-B(3)-H(3B)    | 58.0(19)  | C(2)-C(7)-H(7B)  | 109.5      |
| H(3A)-B(3)-H(3B) | 106(3)    | H(7A)-C(7)-H(7B) | 109.5      |
| Zr-B(3)-H(3C)    | 63.6(18)  | C(2)-C(7)-H(7C)  | 109.5      |
| H(3A)-B(3)-H(3C) | 109(3)    | H(7A)-C(7)-H(7C) | 109.5      |
| H(3B)-B(3)-H(3C) | 97(3)     | H(7B)-C(7)-H(7C) | 109.5      |
| Zr-B(3)-H(3D)    | 170(2)    | C(3)-C(8)-H(8A)  | 109.5      |
| H(3A)-B(3)-H(3D) | 115(3)    | C(3)-C(8)-H(8B)  | 109.5      |
| H(3B)-B(3)-H(3D) | 116(3)    | H(8A)-C(8)-H(8B) | 109.5      |
| H(3C)-B(3)-H(3D) | 112(3)    | C(3)-C(8)-H(8C)  | 109.5      |
| C(2)-C(1)-C(5)   | 107.9(2)  | H(8A)-C(8)-H(8C) | 109.5      |
| C(2)-C(1)-C(6)   | 126.3(2)  | H(8B)-C(8)-H(8C) | 109.5      |
| C(5)-C(1)-C(6)   | 125.5(2)  | C(4)-C(9)-H(9A)  | 109.5      |
| C(2)-C(1)-Zr     | 73.52(14) | C(4)-C(9)-H(9B)  | 109.5      |

Supplementary Material (ESI) for Dalton Transactions  
This journal is (c) The Royal Society of Chemistry 2008

|                   |       |                     |       |
|-------------------|-------|---------------------|-------|
| H(9A)-C(9)-H(9B)  | 109.5 | C(5)-C(10)-H(10B)   | 109.5 |
| C(4)-C(9)-H(9C)   | 109.5 | H(10A)-C(10)-H(10B) | 109.5 |
| H(9A)-C(9)-H(9C)  | 109.5 | C(5)-C(10)-H(10C)   | 109.5 |
| H(9B)-C(9)-H(9C)  | 109.5 | H(10A)-C(10)-H(10C) | 109.5 |
| C(5)-C(10)-H(10A) | 109.5 | H(10B)-C(10)-H(10C) | 109.5 |

---

Symmetry transformations used to generate equivalent atoms:

Table S16. Crystal data and structure refinement for  
[( $\mu_3$ -O)( $\mu_2$ -OC<sub>2</sub>H<sub>5</sub>)<sub>3</sub>{(Cp\*Zr(OC<sub>2</sub>H<sub>5</sub>)<sub>2</sub>(BCH<sub>3</sub>))}] [HB(C<sub>6</sub>F<sub>5</sub>)<sub>3</sub>].

---

|                                   |                                                                                               |                             |
|-----------------------------------|-----------------------------------------------------------------------------------------------|-----------------------------|
| Empirical formula                 | C <sub>49</sub> H <sub>59</sub> B <sub>2</sub> F <sub>15</sub> O <sub>6</sub> Zr <sub>2</sub> |                             |
| Formula weight                    | 1233.02                                                                                       |                             |
| Temperature                       | 150(2) K                                                                                      |                             |
| Wavelength                        | 0.71073 Å                                                                                     |                             |
| Crystal system                    | Monoclinic                                                                                    |                             |
| Space group                       | P2(1)/c                                                                                       |                             |
| Unit cell dimensions              | a = 10.5767(5) Å                                                                              | $\alpha = 90^\circ$ .       |
|                                   | b = 16.4862(8) Å                                                                              | $\beta = 93.389(1)^\circ$ . |
|                                   | c = 32.1655(17) Å                                                                             | $\gamma = 90^\circ$ .       |
| Volume                            | 5598.9(5) Å <sup>3</sup>                                                                      |                             |
| Z                                 | 4                                                                                             |                             |
| Density (calculated)              | 1.463 Mg/m <sup>3</sup>                                                                       |                             |
| Absorption coefficient            | 0.466 mm <sup>-1</sup>                                                                        |                             |
| F(000)                            | 2504                                                                                          |                             |
| Crystal size                      | 0.50 x 0.32 x 0.20 mm <sup>3</sup>                                                            |                             |
| Theta range for data collection   | 1.27 to 27.50°.                                                                               |                             |
| Index ranges                      | -13<=h<=12, -21<=k<=17, -41<=l<=41                                                            |                             |
| Reflections collected             | 49575                                                                                         |                             |
| Independent reflections           | 12748 [R(int) = 0.0591]                                                                       |                             |
| Completeness to theta = 27.50°    | 99.2 %                                                                                        |                             |
| Absorption correction             | Semi-empirical from equivalents                                                               |                             |
| Max. and min. transmission        | 0.9126 and 0.8005                                                                             |                             |
| Refinement method                 | Full-matrix least-squares on F <sup>2</sup>                                                   |                             |
| Data / restraints / parameters    | 12748 / 4 / 689                                                                               |                             |
| Goodness-of-fit on F <sup>2</sup> | 1.089                                                                                         |                             |
| Final R indices [I>2sigma(I)]     | R1 = 0.0695, wR2 = 0.1928                                                                     |                             |
| R indices (all data)              | R1 = 0.0997, wR2 = 0.2137                                                                     |                             |
| Largest diff. peak and hole       | 2.181 and -0.568 e.Å <sup>-3</sup>                                                            |                             |

---

Table S17. Atomic coordinates ( $\times 10^4$ ) and equivalent isotropic displacement parameters ( $\text{\AA}^2 \times 10^3$ ) for  $[(\mu_3\text{-O})(\mu_2\text{-OC}_2\text{H}_5)_3\{(\text{Cp}^*\text{Zr}(\text{OC}_2\text{H}_5)_2(\text{BCH}_3)\}_)]\text{[HB}(\text{C}_6\text{F}_5)_3]$ .  $U(\text{eq})$  is defined as one third of the trace of the orthogonalized  $U^{ij}$  tensor.

|       | x        | y        | z       | U(eq)  |
|-------|----------|----------|---------|--------|
| Zr(1) | 1625(1)  | 7071(1)  | 1901(1) | 29(1)  |
| Zr(2) | 577(1)   | 6907(1)  | 895(1)  | 34(1)  |
| O(1)  | 2245(3)  | 7128(2)  | 1278(1) | 34(1)  |
| O(2)  | 335(4)   | 6366(2)  | 1491(1) | 39(1)  |
| O(3)  | 239(3)   | 7487(2)  | 2190(1) | 43(1)  |
| O(4)  | 2014(4)  | 8273(2)  | 1659(1) | 41(1)  |
| O(5)  | 1308(4)  | 8140(2)  | 904(1)  | 49(1)  |
| O(6)  | -1105(4) | 7338(3)  | 871(1)  | 57(1)  |
| B(1)  | 2395(7)  | 8002(4)  | 1228(2) | 43(2)  |
| C(1)  | -947(7)  | 6091(5)  | 1580(2) | 64(2)  |
| C(2)  | -972(8)  | 5445(6)  | 1880(3) | 96(3)  |
| C(3)  | -661(6)  | 7786(4)  | 2466(2) | 57(2)  |
| C(4)  | -1788(7) | 8129(5)  | 2240(3) | 76(2)  |
| C(5)  | 2284(6)  | 9075(4)  | 1812(2) | 58(2)  |
| C(6)  | 1290(30) | 9380(20) | 2075(9) | 88(11) |
| C(6') | 1090(20) | 9500(20) | 1890(9) | 74(8)  |
| C(7)  | 839(8)   | 8928(4)  | 796(2)  | 70(2)  |
| C(8)  | 575(14)  | 9018(7)  | 352(3)  | 149(6) |
| C(9)  | -2362(8) | 7638(6)  | 816(3)  | 112(3) |
| C(10) | -2259(9) | 8329(6)  | 515(3)  | 97(3)  |
| C(11) | 3698(6)  | 8361(5)  | 1098(2) | 63(2)  |
| C(12) | 2266(5)  | 6227(3)  | 2523(2) | 39(1)  |
| C(13) | 2831(5)  | 6995(3)  | 2595(2) | 34(1)  |
| C(14) | 3766(5)  | 7104(3)  | 2303(2) | 34(1)  |
| C(15) | 3771(5)  | 6407(4)  | 2048(2) | 41(1)  |
| C(16) | 2848(6)  | 5861(3)  | 2181(2) | 43(1)  |
| C(17) | 1299(6)  | 5836(4)  | 2792(2) | 59(2)  |
| C(18) | 2535(6)  | 7550(4)  | 2944(2) | 47(1)  |
| C(19) | 4687(5)  | 7796(4)  | 2296(2) | 49(2)  |
| C(20) | 4690(6)  | 6245(5)  | 1721(2) | 59(2)  |
| C(21) | 2618(8)  | 5025(4)  | 2013(2) | 67(2)  |
| C(22) | 1960(6)  | 5999(4)  | 487(2)  | 48(2)  |
| C(23) | 1529(6)  | 6600(4)  | 214(2)  | 48(1)  |
| C(24) | 205(6)   | 6525(4)  | 146(2)  | 52(2)  |
| C(25) | -178(7)  | 5854(5)  | 383(2)  | 67(2)  |
| C(26) | 945(9)   | 5534(4)  | 598(2)  | 63(2)  |
| C(27) | 3351(8)  | 5859(6)  | 620(2)  | 86(3)  |
| C(28) | 2348(9)  | 7199(5)  | -7(3)   | 82(3)  |
| C(29) | -661(10) | 7023(6)  | -142(2) | 97(3)  |
| C(30) | -1504(9) | 5517(7)  | 379(3)  | 124(5) |

Supplementary Material (ESI) for Dalton Transactions  
This journal is (c) The Royal Society of Chemistry 2008

|       |          |         |         |        |
|-------|----------|---------|---------|--------|
| C(31) | 1001(13) | 4776(5) | 866(2)  | 121(5) |
| B(2)  | 3289(6)  | 2407(4) | 1547(2) | 40(1)  |
| C(32) | 4082(5)  | 1568(4) | 1659(2) | 45(1)  |
| C(33) | 3876(6)  | 1153(4) | 2022(2) | 49(2)  |
| C(34) | 4528(6)  | 464(4)  | 2151(2) | 54(2)  |
| C(35) | 5434(6)  | 166(4)  | 1910(2) | 58(2)  |
| C(36) | 5682(6)  | 543(4)  | 1547(2) | 59(2)  |
| C(37) | 5011(6)  | 1233(4) | 1428(2) | 54(2)  |
| C(38) | 1814(5)  | 2230(3) | 1380(2) | 38(1)  |
| C(39) | 1333(6)  | 1519(4) | 1205(2) | 45(1)  |
| C(40) | 78(6)    | 1410(4) | 1072(2) | 49(1)  |
| C(41) | -761(5)  | 2039(4) | 1109(2) | 44(1)  |
| C(42) | -334(6)  | 2757(3) | 1274(2) | 41(1)  |
| C(43) | 916(5)   | 2828(3) | 1404(2) | 39(1)  |
| C(44) | 4002(5)  | 2995(3) | 1223(2) | 41(1)  |
| C(45) | 3864(6)  | 2934(4) | 797(2)  | 50(2)  |
| C(46) | 4476(6)  | 3420(5) | 526(2)  | 58(2)  |
| C(47) | 5270(6)  | 4013(4) | 680(2)  | 56(2)  |
| C(48) | 5449(6)  | 4115(4) | 1102(2) | 55(2)  |
| C(49) | 4810(5)  | 3616(4) | 1364(2) | 43(1)  |
| F(2)  | 2972(4)  | 1412(2) | 2273(1) | 59(1)  |
| F(3)  | 4248(4)  | 83(2)   | 2505(1) | 70(1)  |
| F(4)  | 6081(4)  | -508(2) | 2032(2) | 83(1)  |
| F(5)  | 6571(4)  | 240(3)  | 1308(2) | 87(1)  |
| F(6)  | 5304(4)  | 1564(3) | 1064(1) | 73(1)  |
| F(7)  | 2105(3)  | 875(2)  | 1149(1) | 65(1)  |
| F(8)  | -321(4)  | 696(2)  | 904(2)  | 77(1)  |
| F(9)  | -1989(3) | 1943(3) | 982(1)  | 65(1)  |
| F(10) | -1148(3) | 3381(2) | 1306(1) | 59(1)  |
| F(11) | 1259(3)  | 3551(2) | 1578(1) | 50(1)  |
| F(12) | 3132(4)  | 2342(3) | 621(1)  | 63(1)  |
| F(13) | 4296(4)  | 3322(3) | 108(1)  | 81(1)  |
| F(14) | 5877(4)  | 4499(3) | 414(2)  | 82(1)  |
| F(15) | 6240(4)  | 4694(3) | 1255(2) | 81(1)  |
| F(16) | 5029(3)  | 3753(2) | 1775(1) | 56(1)  |

---

Table S18. Anisotropic displacement parameters ( $\text{\AA}^2 \times 10^3$ ) for  $[(\mu_3\text{-O})(\mu_2\text{-OC}_2\text{H}_5)_3\{\text{Cp}^*\text{Zr}(\text{OC}_2\text{H}_5)_2(\text{BCH}_3)\}][\text{HB}(\text{C}_6\text{F}_5)_3]$ . The anisotropic displacement factor exponent takes the form:  $-2p^2[h^2 a^*2U^{11} + \dots + 2 h k a^* b^* U^{12}]$

|       | U11     | U22     | U33     | U23     | U13    | U12     |
|-------|---------|---------|---------|---------|--------|---------|
| Zr(1) | 31(1)   | 29(1)   | 27(1)   | -4(1)   | 1(1)   | 0(1)    |
| Zr(2) | 42(1)   | 34(1)   | 26(1)   | -4(1)   | 1(1)   | -3(1)   |
| O(1)  | 35(2)   | 35(2)   | 32(2)   | -2(1)   | 4(1)   | -1(2)   |
| O(2)  | 50(2)   | 36(2)   | 31(2)   | -3(2)   | 3(2)   | -15(2)  |
| O(3)  | 37(2)   | 47(2)   | 44(2)   | -5(2)   | 8(2)   | 3(2)    |
| O(4)  | 48(2)   | 30(2)   | 47(2)   | -4(2)   | -2(2)  | -4(2)   |
| O(5)  | 55(3)   | 37(2)   | 53(2)   | 7(2)    | -12(2) | -2(2)   |
| O(6)  | 42(2)   | 75(3)   | 54(3)   | -7(2)   | -4(2)  | 4(2)    |
| B(1)  | 45(4)   | 45(4)   | 40(3)   | 5(3)    | 1(3)   | -4(3)   |
| C(1)  | 63(4)   | 72(5)   | 56(4)   | -6(3)   | 4(3)   | -26(4)  |
| C(2)  | 78(6)   | 115(8)  | 95(6)   | 31(6)   | 12(5)  | -44(5)  |
| C(3)  | 51(4)   | 71(5)   | 52(4)   | -6(3)   | 21(3)  | 4(3)    |
| C(4)  | 49(4)   | 76(5)   | 104(6)  | -9(5)   | 17(4)  | 11(4)   |
| C(5)  | 60(4)   | 37(3)   | 74(4)   | -12(3)  | -4(3)  | -8(3)   |
| C(6)  | 86(15)  | 58(17)  | 130(30) | -34(17) | 54(17) | -24(11) |
| C(6') | 90(15)  | 31(10)  | 110(20) | -25(13) | 54(15) | -7(8)   |
| C(7)  | 100(6)  | 44(4)   | 65(4)   | 11(3)   | -10(4) | 14(4)   |
| C(8)  | 277(17) | 98(8)   | 70(6)   | 19(6)   | -12(8) | 81(10)  |
| C(10) | 78(6)   | 103(7)  | 109(7)  | 0(6)    | -11(5) | 18(5)   |
| C(11) | 62(4)   | 72(5)   | 57(4)   | 15(3)   | 8(3)   | -23(4)  |
| C(12) | 43(3)   | 38(3)   | 35(3)   | 7(2)    | -3(2)  | -3(2)   |
| C(13) | 35(3)   | 38(3)   | 28(2)   | 1(2)    | -1(2)  | 0(2)    |
| C(14) | 29(3)   | 39(3)   | 33(2)   | 2(2)    | -2(2)  | -2(2)   |
| C(15) | 42(3)   | 45(3)   | 35(3)   | -2(2)   | 1(2)   | 11(3)   |
| C(16) | 50(3)   | 32(3)   | 46(3)   | 0(2)    | -8(3)  | 7(3)    |
| C(17) | 46(4)   | 68(5)   | 60(4)   | 23(3)   | -7(3)  | -17(3)  |
| C(18) | 40(3)   | 62(4)   | 38(3)   | -12(3)  | 0(2)   | 1(3)    |
| C(19) | 34(3)   | 63(4)   | 49(3)   | 11(3)   | -7(3)  | -11(3)  |
| C(20) | 52(4)   | 72(5)   | 53(4)   | -8(3)   | 7(3)   | 23(3)   |
| C(21) | 82(5)   | 35(3)   | 82(5)   | -12(3)  | -18(4) | 7(3)    |
| C(22) | 68(4)   | 43(3)   | 34(3)   | -7(2)   | 0(3)   | 18(3)   |
| C(23) | 63(4)   | 46(3)   | 36(3)   | -2(2)   | 12(3)  | 4(3)    |
| C(24) | 61(4)   | 66(4)   | 27(3)   | -9(3)   | 1(3)   | 9(3)    |
| C(25) | 80(5)   | 76(5)   | 45(3)   | -37(3)  | 17(3)  | -34(4)  |
| C(26) | 127(7)  | 39(3)   | 26(3)   | -10(2)  | 12(3)  | -6(4)   |
| C(27) | 89(6)   | 111(7)  | 57(4)   | -24(4)  | -11(4) | 56(5)   |
| C(28) | 99(6)   | 82(6)   | 68(5)   | 5(4)    | 43(5)  | -3(5)   |
| C(29) | 119(8)  | 131(9)  | 39(4)   | -15(4)  | -16(4) | 56(6)   |
| C(30) | 106(7)  | 179(11) | 91(6)   | -91(7)  | 42(5)  | -81(7)  |
| C(31) | 279(15) | 37(4)   | 49(4)   | 0(3)    | 35(6)  | -9(6)   |

Supplementary Material (ESI) for Dalton Transactions  
This journal is (c) The Royal Society of Chemistry 2008

|       |       |        |        |        |        |        |
|-------|-------|--------|--------|--------|--------|--------|
| B(2)  | 45(4) | 38(3)  | 36(3)  | 3(3)   | -7(3)  | 2(3)   |
| C(32) | 40(3) | 38(3)  | 55(3)  | 2(3)   | -8(3)  | 0(3)   |
| C(33) | 50(4) | 37(3)  | 59(4)  | 1(3)   | -16(3) | -8(3)  |
| C(34) | 59(4) | 30(3)  | 71(4)  | 5(3)   | -20(3) | -15(3) |
| C(35) | 46(4) | 26(3)  | 98(5)  | 6(3)   | -27(4) | -1(3)  |
| C(36) | 45(4) | 41(4)  | 90(5)  | -2(3)  | -6(3)  | 7(3)   |
| C(37) | 50(4) | 45(4)  | 67(4)  | 9(3)   | -5(3)  | 2(3)   |
| C(38) | 37(3) | 37(3)  | 39(3)  | 0(2)   | 1(2)   | -2(2)  |
| C(39) | 43(3) | 41(3)  | 50(3)  | -2(3)  | 3(3)   | 3(3)   |
| C(40) | 50(4) | 45(3)  | 51(3)  | -4(3)  | 1(3)   | -13(3) |
| C(41) | 32(3) | 59(4)  | 40(3)  | 13(3)  | 0(2)   | 0(3)   |
| C(42) | 49(3) | 40(3)  | 35(3)  | 14(2)  | 11(2)  | 10(3)  |
| C(43) | 44(3) | 32(3)  | 40(3)  | 6(2)   | 1(2)   | -1(2)  |
| C(44) | 35(3) | 39(3)  | 50(3)  | 6(2)   | -5(2)  | 6(2)   |
| C(45) | 37(3) | 57(4)  | 55(4)  | 7(3)   | -3(3)  | 0(3)   |
| C(46) | 41(4) | 78(5)  | 54(4)  | 17(3)  | 8(3)   | 9(3)   |
| C(47) | 49(4) | 47(4)  | 73(4)  | 15(3)  | 26(3)  | 5(3)   |
| C(48) | 37(3) | 38(3)  | 89(5)  | -8(3)  | 11(3)  | 4(3)   |
| C(49) | 35(3) | 42(3)  | 51(3)  | -3(3)  | 0(2)   | 14(2)  |
| F(2)  | 71(3) | 50(2)  | 56(2)  | 9(2)   | 3(2)   | -3(2)  |
| F(3)  | 90(3) | 43(2)  | 73(3)  | 17(2)  | -22(2) | -12(2) |
| F(4)  | 70(3) | 43(2)  | 131(4) | 16(2)  | -33(3) | 6(2)   |
| F(5)  | 65(3) | 69(3)  | 126(4) | 0(3)   | 9(3)   | 22(2)  |
| F(6)  | 71(3) | 70(3)  | 81(3)  | 11(2)  | 20(2)  | 19(2)  |
| F(7)  | 54(2) | 46(2)  | 94(3)  | -21(2) | -8(2)  | 13(2)  |
| F(8)  | 63(3) | 55(2)  | 109(3) | -23(2) | -16(2) | -10(2) |
| F(9)  | 38(2) | 80(3)  | 76(3)  | 15(2)  | -6(2)  | -8(2)  |
| F(10) | 50(2) | 54(2)  | 73(2)  | 17(2)  | 14(2)  | 20(2)  |
| F(11) | 63(2) | 29(2)  | 57(2)  | 2(1)   | 0(2)   | 2(2)   |
| F(12) | 55(2) | 87(3)  | 48(2)  | -6(2)  | -5(2)  | -21(2) |
| F(13) | 74(3) | 114(4) | 55(2)  | 15(2)  | 10(2)  | -1(3)  |
| F(14) | 85(3) | 69(3)  | 96(3)  | 21(2)  | 41(3)  | -4(2)  |
| F(15) | 63(3) | 55(3)  | 126(4) | -27(3) | 29(2)  | -18(2) |
| F(16) | 49(2) | 54(2)  | 65(2)  | -15(2) | -3(2)  | 0(2)   |

---

Table S19. Hydrogen coordinates ( $\times 10^4$ ) and isotropic displacement parameters ( $\text{\AA}^2 \times 10^3$ ) for  $[(\mu_3\text{-O})(\mu_2\text{-OC}_2\text{H}_5)_3\{(\text{Cp}^*\text{Zr}(\text{OC}_2\text{H}_5)_2(\text{BCH}_3)\}_)]\text{[HB}(\text{C}_6\text{F}_5)_3]$ .

|        | x     | y     | z    | U(eq) |
|--------|-------|-------|------|-------|
| H(1A)  | -1425 | 6558  | 1684 | 76    |
| H(1B)  | -1387 | 5907  | 1316 | 76    |
| H(2A)  | -511  | 4976  | 1779 | 144   |
| H(2B)  | -1852 | 5291  | 1919 | 144   |
| H(2C)  | -570  | 5628  | 2146 | 144   |
| H(3A)  | -256  | 8210  | 2647 | 69    |
| H(3B)  | -924  | 7338  | 2647 | 69    |
| H(4A)  | -1536 | 8587  | 2069 | 114   |
| H(4B)  | -2388 | 8316  | 2440 | 114   |
| H(4C)  | -2191 | 7712  | 2060 | 114   |
| H(5A)  | 2363  | 9447  | 1574 | 69    |
| H(5B)  | 3104  | 9071  | 1977 | 69    |
| H(5'A) | 2752  | 9380  | 1606 | 69    |
| H(5'B) | 2823  | 9042  | 2074 | 69    |
| H(6A)  | 1503  | 9925  | 2173 | 133   |
| H(6B)  | 1216  | 9016  | 2314 | 133   |
| H(6C)  | 474   | 9391  | 1911 | 133   |
| H(6'A) | 1287  | 10050 | 1994 | 111   |
| H(6'B) | 636   | 9203  | 2098 | 111   |
| H(6'C) | 563   | 9539  | 1630 | 111   |
| H(7A)  | 1472  | 9339  | 893  | 84    |
| H(7B)  | 54    | 9029  | 941  | 84    |
| H(8A)  | 1372  | 9007  | 211  | 223   |
| H(8B)  | 145   | 9536  | 295  | 223   |
| H(8C)  | 31    | 8572  | 248  | 223   |
| H(9A)  | -2670 | 7830  | 1083 | 134   |
| H(9B)  | -2944 | 7214  | 699  | 134   |
| H(10A) | -3105 | 8543  | 439  | 146   |
| H(10B) | -1872 | 8135  | 264  | 146   |
| H(10C) | -1732 | 8759  | 645  | 146   |
| H(11A) | 4356  | 8250  | 1318 | 95    |
| H(11B) | 3615  | 8949  | 1058 | 95    |
| H(11C) | 3930  | 8108  | 838  | 95    |
| H(17A) | 1671  | 5769  | 3076 | 88    |
| H(17B) | 1055  | 5305  | 2677 | 88    |
| H(17C) | 549   | 6184  | 2797 | 88    |
| H(18A) | 3057  | 7403  | 3194 | 70    |
| H(18B) | 1638  | 7499  | 2999 | 70    |
| H(18C) | 2716  | 8111  | 2866 | 70    |
| H(19A) | 5504  | 7627  | 2426 | 74    |
| H(19B) | 4359  | 8257  | 2449 | 74    |



Supplementary Material (ESI) for Dalton Transactions  
This journal is (c) The Royal Society of Chemistry 2008

|        |          |          |          |     |
|--------|----------|----------|----------|-----|
| H(19C) | 4796     | 7957     | 2006     | 74  |
| H(20A) | 4451     | 5744     | 1573     | 89  |
| H(20B) | 5544     | 6186     | 1854     | 89  |
| H(20C) | 4677     | 6698     | 1524     | 89  |
| H(21A) | 2555     | 5044     | 1708     | 101 |
| H(21B) | 1826     | 4813     | 2113     | 101 |
| H(21C) | 3321     | 4671     | 2107     | 101 |
| H(27A) | 3747     | 5532     | 409      | 129 |
| H(27B) | 3414     | 5573     | 888      | 129 |
| H(27C) | 3786     | 6383     | 649      | 129 |
| H(28A) | 3075     | 7355     | 180      | 122 |
| H(28B) | 1848     | 7683     | -83      | 122 |
| H(28C) | 2650     | 6948     | -258     | 122 |
| H(29A) | -342     | 7580     | -152     | 146 |
| H(29B) | -1515    | 7025     | -39      | 146 |
| H(29C) | -689     | 6788     | -422     | 146 |
| H(30A) | -1646    | 5151     | 141      | 186 |
| H(30B) | -2115    | 5964     | 357      | 186 |
| H(30C) | -1611    | 5217     | 638      | 186 |
| H(31A) | 1189     | 4305     | 694      | 181 |
| H(31B) | 183      | 4695     | 988      | 181 |
| H(31C) | 1667     | 4836     | 1089     | 181 |
| H(2)   | 3140(50) | 2690(40) | 1833(19) | 48  |

---

Table S20. Bond lengths [Å] and angles [°] for  
[( $\mu_3$ -O)( $\mu_2$ -OC<sub>2</sub>H<sub>5</sub>)<sub>3</sub>{(Cp\*Zr(OC<sub>2</sub>H<sub>5</sub>)<sub>2</sub>(BCH<sub>3</sub>))<sub>2</sub>}] [HB(C<sub>6</sub>F<sub>5</sub>)<sub>3</sub>].

|             |           |             |           |
|-------------|-----------|-------------|-----------|
| Zr(1)-O(3)  | 1.908(4)  | C(15)-C(16) | 1.413(8)  |
| Zr(1)-O(1)  | 2.147(3)  | C(15)-C(20) | 1.497(8)  |
| Zr(1)-O(2)  | 2.177(3)  | C(16)-C(21) | 1.495(8)  |
| Zr(1)-O(4)  | 2.178(4)  | C(22)-C(23) | 1.383(8)  |
| Zr(1)-C(12) | 2.496(5)  | C(22)-C(26) | 1.384(10) |
| Zr(1)-C(13) | 2.506(5)  | C(22)-C(27) | 1.525(10) |
| Zr(1)-C(16) | 2.514(5)  | C(23)-C(24) | 1.410(9)  |
| Zr(1)-C(15) | 2.539(5)  | C(23)-C(28) | 1.518(9)  |
| Zr(1)-C(14) | 2.541(5)  | C(24)-C(25) | 1.418(10) |
| Zr(1)-B(1)  | 2.813(6)  | C(24)-C(29) | 1.506(10) |
| Zr(1)-Zr(2) | 3.3680(7) | C(25)-C(26) | 1.438(11) |
| Zr(2)-O(6)  | 1.914(4)  | C(25)-C(30) | 1.507(10) |
| Zr(2)-O(1)  | 2.121(3)  | C(26)-C(31) | 1.517(10) |
| Zr(2)-O(2)  | 2.144(3)  | B(2)-C(44)  | 1.638(9)  |
| Zr(2)-O(5)  | 2.174(4)  | B(2)-C(38)  | 1.645(8)  |
| Zr(2)-C(25) | 2.493(6)  | B(2)-C(32)  | 1.647(9)  |
| Zr(2)-C(26) | 2.497(6)  | C(32)-C(37) | 1.380(9)  |
| Zr(2)-C(24) | 2.501(5)  | C(32)-C(33) | 1.383(8)  |
| Zr(2)-C(22) | 2.516(6)  | C(33)-F(2)  | 1.354(7)  |
| Zr(2)-C(23) | 2.517(5)  | C(33)-C(34) | 1.380(9)  |
| Zr(2)-B(1)  | 2.803(7)  | C(34)-F(3)  | 1.348(8)  |
| O(1)-B(1)   | 1.460(7)  | C(34)-C(35) | 1.359(10) |
| O(2)-C(1)   | 1.474(7)  | C(35)-F(4)  | 1.351(7)  |
| O(3)-C(3)   | 1.428(7)  | C(35)-C(36) | 1.361(10) |
| O(4)-C(5)   | 1.433(7)  | C(36)-F(5)  | 1.346(8)  |
| O(4)-B(1)   | 1.532(8)  | C(36)-C(37) | 1.383(9)  |
| O(5)-C(7)   | 1.427(7)  | C(37)-F(6)  | 1.344(8)  |
| O(5)-B(1)   | 1.523(8)  | C(38)-C(43) | 1.374(8)  |
| O(6)-C(9)   | 1.419(8)  | C(38)-C(39) | 1.385(8)  |
| B(1)-C(11)  | 1.578(9)  | C(39)-F(7)  | 1.359(7)  |
| C(1)-C(2)   | 1.438(10) | C(39)-C(40) | 1.382(8)  |
| C(3)-C(4)   | 1.472(10) | C(40)-F(8)  | 1.350(7)  |
| C(5)-C(6)   | 1.477(10) | C(40)-C(41) | 1.375(9)  |
| C(5)-C(6')  | 1.479(10) | C(41)-F(9)  | 1.348(6)  |
| C(7)-C(8)   | 1.449(11) | C(41)-C(42) | 1.363(8)  |
| C(9)-C(10)  | 1.503(8)  | C(42)-F(10) | 1.349(6)  |
| C(12)-C(13) | 1.414(7)  | C(42)-C(43) | 1.367(8)  |
| C(12)-C(16) | 1.426(8)  | C(43)-F(11) | 1.358(6)  |
| C(12)-C(17) | 1.522(8)  | C(44)-C(45) | 1.373(8)  |
| C(13)-C(14) | 1.415(7)  | C(44)-C(49) | 1.392(8)  |
| C(13)-C(18) | 1.495(7)  | C(45)-F(12) | 1.350(7)  |
| C(14)-C(15) | 1.412(7)  | C(45)-C(46) | 1.373(9)  |
| C(14)-C(19) | 1.501(7)  | C(46)-F(13) | 1.357(8)  |

Supplementary Material (ESI) for Dalton Transactions  
This journal is (c) The Royal Society of Chemistry 2008

|                   |            |                   |            |
|-------------------|------------|-------------------|------------|
| C(46)-C(47)       | 1.363(10)  | C(48)-F(15)       | 1.343(7)   |
| C(47)-F(14)       | 1.362(7)   | C(48)-C(49)       | 1.382(9)   |
| C(47)-C(48)       | 1.370(10)  | C(49)-F(16)       | 1.347(7)   |
| O(3)-Zr(1)-O(1)   | 136.34(15) | C(16)-Zr(1)-B(1)  | 122.8(2)   |
| O(3)-Zr(1)-O(2)   | 90.82(15)  | C(15)-Zr(1)-B(1)  | 94.69(19)  |
| O(1)-Zr(1)-O(2)   | 70.91(13)  | C(14)-Zr(1)-B(1)  | 95.14(18)  |
| O(3)-Zr(1)-O(4)   | 90.78(16)  | O(3)-Zr(1)-Zr(2)  | 106.08(12) |
| O(1)-Zr(1)-O(4)   | 63.35(13)  | O(1)-Zr(1)-Zr(2)  | 37.64(9)   |
| O(2)-Zr(1)-O(4)   | 113.20(13) | O(2)-Zr(1)-Zr(2)  | 38.43(9)   |
| O(3)-Zr(1)-C(12)  | 89.50(18)  | O(4)-Zr(1)-Zr(2)  | 77.72(10)  |
| O(1)-Zr(1)-C(12)  | 133.51(16) | C(12)-Zr(1)-Zr(2) | 141.53(13) |
| O(2)-Zr(1)-C(12)  | 108.55(16) | C(13)-Zr(1)-Zr(2) | 166.45(12) |
| O(4)-Zr(1)-C(12)  | 138.24(16) | C(16)-Zr(1)-Zr(2) | 114.38(13) |
| O(3)-Zr(1)-C(13)  | 87.16(16)  | C(15)-Zr(1)-Zr(2) | 112.55(12) |
| O(1)-Zr(1)-C(13)  | 131.73(15) | C(14)-Zr(1)-Zr(2) | 136.30(12) |
| O(2)-Zr(1)-C(13)  | 141.29(15) | B(1)-Zr(1)-Zr(2)  | 53.02(14)  |
| O(4)-Zr(1)-C(13)  | 105.48(15) | O(6)-Zr(2)-O(1)   | 134.39(16) |
| C(12)-Zr(1)-C(13) | 32.84(17)  | O(6)-Zr(2)-O(2)   | 91.83(17)  |
| O(3)-Zr(1)-C(16)  | 120.35(18) | O(1)-Zr(2)-O(2)   | 72.05(13)  |
| O(1)-Zr(1)-C(16)  | 100.93(16) | O(6)-Zr(2)-O(5)   | 89.00(19)  |
| O(2)-Zr(1)-C(16)  | 94.79(16)  | O(1)-Zr(2)-O(5)   | 63.23(14)  |
| O(4)-Zr(1)-C(16)  | 138.25(17) | O(2)-Zr(2)-O(5)   | 116.06(14) |
| C(12)-Zr(1)-C(16) | 33.06(18)  | O(6)-Zr(2)-C(25)  | 88.3(2)    |
| C(13)-Zr(1)-C(16) | 54.45(17)  | O(1)-Zr(2)-C(25)  | 136.6(2)   |
| O(3)-Zr(1)-C(15)  | 140.26(17) | O(2)-Zr(2)-C(25)  | 104.5(2)   |
| O(1)-Zr(1)-C(15)  | 82.73(15)  | O(5)-Zr(2)-C(25)  | 139.4(2)   |
| O(2)-Zr(1)-C(15)  | 113.80(17) | O(6)-Zr(2)-C(26)  | 119.1(2)   |
| O(4)-Zr(1)-C(15)  | 105.86(17) | O(1)-Zr(2)-C(26)  | 103.6(2)   |
| C(12)-Zr(1)-C(15) | 54.09(18)  | O(2)-Zr(2)-C(26)  | 89.70(17)  |
| C(13)-Zr(1)-C(15) | 53.92(17)  | O(5)-Zr(2)-C(26)  | 142.1(2)   |
| C(16)-Zr(1)-C(15) | 32.47(19)  | C(25)-Zr(2)-C(26) | 33.5(3)    |
| O(3)-Zr(1)-C(14)  | 115.63(16) | O(6)-Zr(2)-C(24)  | 87.7(2)    |
| O(1)-Zr(1)-C(14)  | 99.30(15)  | O(1)-Zr(2)-C(24)  | 132.91(18) |
| O(2)-Zr(1)-C(14)  | 145.83(16) | O(2)-Zr(2)-C(24)  | 137.49(19) |
| O(4)-Zr(1)-C(14)  | 88.91(15)  | O(5)-Zr(2)-C(24)  | 106.4(2)   |
| C(12)-Zr(1)-C(14) | 54.06(17)  | C(25)-Zr(2)-C(24) | 33.0(2)    |
| C(13)-Zr(1)-C(14) | 32.55(16)  | C(26)-Zr(2)-C(24) | 54.7(2)    |
| C(16)-Zr(1)-C(14) | 53.93(18)  | O(6)-Zr(2)-C(22)  | 140.08(19) |
| C(15)-Zr(1)-C(14) | 32.29(17)  | O(1)-Zr(2)-C(22)  | 85.18(17)  |
| O(3)-Zr(1)-B(1)   | 116.33(19) | O(2)-Zr(2)-C(22)  | 108.85(17) |
| O(1)-Zr(1)-B(1)   | 30.65(16)  | O(5)-Zr(2)-C(22)  | 110.2(2)   |
| O(2)-Zr(1)-B(1)   | 91.44(16)  | C(25)-Zr(2)-C(22) | 54.1(2)    |
| O(4)-Zr(1)-B(1)   | 32.70(17)  | C(26)-Zr(2)-C(22) | 32.0(2)    |
| C(12)-Zr(1)-B(1)  | 147.46(19) | C(24)-Zr(2)-C(22) | 53.9(2)    |
| C(13)-Zr(1)-B(1)  | 123.82(18) | O(6)-Zr(2)-C(23)  | 117.2(2)   |

Supplementary Material (ESI) for Dalton Transactions  
This journal is (c) The Royal Society of Chemistry 2008

|                   |            |                   |           |
|-------------------|------------|-------------------|-----------|
| O(1)-Zr(2)-C(23)  | 100.28(18) | O(1)-B(1)-Zr(2)   | 47.9(2)   |
| O(2)-Zr(2)-C(23)  | 140.36(18) | O(5)-B(1)-Zr(2)   | 50.3(2)   |
| O(5)-Zr(2)-C(23)  | 92.21(19)  | O(4)-B(1)-Zr(2)   | 108.8(4)  |
| C(25)-Zr(2)-C(23) | 54.1(2)    | C(11)-B(1)-Zr(2)  | 136.9(5)  |
| C(26)-Zr(2)-C(23) | 53.5(2)    | O(1)-B(1)-Zr(1)   | 48.6(2)   |
| C(24)-Zr(2)-C(23) | 32.6(2)    | O(5)-B(1)-Zr(1)   | 111.6(4)  |
| C(22)-Zr(2)-C(23) | 31.90(19)  | O(4)-B(1)-Zr(1)   | 50.2(2)   |
| O(6)-Zr(2)-B(1)   | 113.1(2)   | C(11)-B(1)-Zr(1)  | 134.9(4)  |
| O(1)-Zr(2)-B(1)   | 30.69(16)  | Zr(2)-B(1)-Zr(1)  | 73.69(16) |
| O(2)-Zr(2)-B(1)   | 92.41(16)  | C(2)-C(1)-O(2)    | 114.2(7)  |
| O(5)-Zr(2)-B(1)   | 32.64(17)  | O(3)-C(3)-C(4)    | 112.0(6)  |
| C(25)-Zr(2)-B(1)  | 152.5(2)   | O(4)-C(5)-C(6)    | 111.9(18) |
| C(26)-Zr(2)-B(1)  | 127.7(3)   | O(4)-C(5)-C(6')   | 110.1(16) |
| C(24)-Zr(2)-B(1)  | 126.6(2)   | C(6)-C(5)-C(6')   | 25.4(19)  |
| C(22)-Zr(2)-B(1)  | 100.1(2)   | O(5)-C(7)-C(8)    | 112.1(7)  |
| C(23)-Zr(2)-B(1)  | 99.3(2)    | O(6)-C(9)-C(10)   | 104.0(7)  |
| O(6)-Zr(2)-Zr(1)  | 105.23(13) | C(13)-C(12)-C(16) | 108.0(5)  |
| O(1)-Zr(2)-Zr(1)  | 38.18(9)   | C(13)-C(12)-C(17) | 125.3(5)  |
| O(2)-Zr(2)-Zr(1)  | 39.13(9)   | C(16)-C(12)-C(17) | 126.5(5)  |
| O(5)-Zr(2)-Zr(1)  | 79.43(11)  | C(13)-C(12)-Zr(1) | 74.0(3)   |
| C(25)-Zr(2)-Zr(1) | 139.9(2)   | C(16)-C(12)-Zr(1) | 74.2(3)   |
| C(26)-Zr(2)-Zr(1) | 113.01(16) | C(17)-C(12)-Zr(1) | 122.2(4)  |
| C(24)-Zr(2)-Zr(1) | 166.06(15) | C(12)-C(13)-C(14) | 108.1(5)  |
| C(22)-Zr(2)-Zr(1) | 112.38(13) | C(12)-C(13)-C(18) | 124.5(5)  |
| C(23)-Zr(2)-Zr(1) | 136.63(15) | C(14)-C(13)-C(18) | 127.3(5)  |
| B(1)-Zr(2)-Zr(1)  | 53.29(13)  | C(12)-C(13)-Zr(1) | 73.2(3)   |
| B(1)-O(1)-Zr(2)   | 101.4(3)   | C(14)-C(13)-Zr(1) | 75.1(3)   |
| B(1)-O(1)-Zr(1)   | 100.8(3)   | C(18)-C(13)-Zr(1) | 121.3(4)  |
| Zr(2)-O(1)-Zr(1)  | 104.18(15) | C(15)-C(14)-C(13) | 108.0(5)  |
| C(1)-O(2)-Zr(2)   | 117.4(3)   | C(15)-C(14)-C(19) | 125.8(5)  |
| C(1)-O(2)-Zr(1)   | 126.7(3)   | C(13)-C(14)-C(19) | 125.9(5)  |
| Zr(2)-O(2)-Zr(1)  | 102.44(14) | C(15)-C(14)-Zr(1) | 73.8(3)   |
| C(3)-O(3)-Zr(1)   | 170.5(4)   | C(13)-C(14)-Zr(1) | 72.4(3)   |
| C(5)-O(4)-B(1)    | 121.5(5)   | C(19)-C(14)-Zr(1) | 124.6(4)  |
| C(5)-O(4)-Zr(1)   | 138.9(4)   | C(14)-C(15)-C(16) | 108.5(5)  |
| B(1)-O(4)-Zr(1)   | 97.1(3)    | C(14)-C(15)-C(20) | 125.3(6)  |
| C(7)-O(5)-B(1)    | 122.6(5)   | C(16)-C(15)-C(20) | 126.0(5)  |
| C(7)-O(5)-Zr(2)   | 136.9(4)   | C(14)-C(15)-Zr(1) | 73.9(3)   |
| B(1)-O(5)-Zr(2)   | 97.1(3)    | C(16)-C(15)-Zr(1) | 72.8(3)   |
| C(9)-O(6)-Zr(2)   | 175.1(6)   | C(20)-C(15)-Zr(1) | 123.9(4)  |
| O(1)-B(1)-O(5)    | 98.0(4)    | C(15)-C(16)-C(12) | 107.5(5)  |
| O(1)-B(1)-O(4)    | 98.8(4)    | C(15)-C(16)-C(21) | 125.3(6)  |
| O(5)-B(1)-O(4)    | 110.3(5)   | C(12)-C(16)-C(21) | 126.9(6)  |
| O(1)-B(1)-C(11)   | 120.2(6)   | C(15)-C(16)-Zr(1) | 74.7(3)   |
| O(5)-B(1)-C(11)   | 113.4(5)   | C(12)-C(16)-Zr(1) | 72.8(3)   |
| O(4)-B(1)-C(11)   | 114.2(5)   | C(21)-C(16)-Zr(1) | 122.2(4)  |

Supplementary Material (ESI) for Dalton Transactions  
This journal is (c) The Royal Society of Chemistry 2008

|                   |          |                   |          |
|-------------------|----------|-------------------|----------|
| C(23)-C(22)-C(26) | 109.2(6) | C(34)-C(35)-C(36) | 120.1(6) |
| C(23)-C(22)-C(27) | 124.3(7) | F(5)-C(36)-C(35)  | 119.8(6) |
| C(26)-C(22)-C(27) | 126.5(7) | F(5)-C(36)-C(37)  | 120.7(7) |
| C(23)-C(22)-Zr(2) | 74.1(3)  | C(35)-C(36)-C(37) | 119.4(7) |
| C(26)-C(22)-Zr(2) | 73.2(4)  | F(6)-C(37)-C(32)  | 120.9(6) |
| C(27)-C(22)-Zr(2) | 121.6(4) | F(6)-C(37)-C(36)  | 115.7(6) |
| C(22)-C(23)-C(24) | 108.9(6) | C(32)-C(37)-C(36) | 123.4(6) |
| C(22)-C(23)-C(28) | 126.0(7) | C(43)-C(38)-C(39) | 113.0(5) |
| C(24)-C(23)-C(28) | 125.0(6) | C(43)-C(38)-B(2)  | 120.0(5) |
| C(22)-C(23)-Zr(2) | 74.0(3)  | C(39)-C(38)-B(2)  | 126.9(5) |
| C(24)-C(23)-Zr(2) | 73.1(3)  | F(7)-C(39)-C(40)  | 115.5(5) |
| C(28)-C(23)-Zr(2) | 123.0(5) | F(7)-C(39)-C(38)  | 120.4(5) |
| C(23)-C(24)-C(25) | 107.3(6) | C(40)-C(39)-C(38) | 124.1(5) |
| C(23)-C(24)-C(29) | 127.6(7) | F(8)-C(40)-C(41)  | 120.2(5) |
| C(25)-C(24)-C(29) | 125.0(7) | F(8)-C(40)-C(39)  | 120.6(6) |
| C(23)-C(24)-Zr(2) | 74.3(3)  | C(41)-C(40)-C(39) | 119.2(6) |
| C(25)-C(24)-Zr(2) | 73.2(3)  | F(9)-C(41)-C(42)  | 120.7(5) |
| C(29)-C(24)-Zr(2) | 120.7(4) | F(9)-C(41)-C(40)  | 120.0(6) |
| C(24)-C(25)-C(26) | 106.9(6) | C(42)-C(41)-C(40) | 119.2(5) |
| C(24)-C(25)-C(30) | 125.3(9) | F(10)-C(42)-C(41) | 119.6(5) |
| C(26)-C(25)-C(30) | 127.6(9) | F(10)-C(42)-C(43) | 121.4(5) |
| C(24)-C(25)-Zr(2) | 73.8(3)  | C(41)-C(42)-C(43) | 119.0(5) |
| C(26)-C(25)-Zr(2) | 73.4(3)  | F(11)-C(43)-C(42) | 115.6(5) |
| C(30)-C(25)-Zr(2) | 121.6(5) | F(11)-C(43)-C(38) | 118.9(5) |
| C(22)-C(26)-C(25) | 107.7(6) | C(42)-C(43)-C(38) | 125.5(5) |
| C(22)-C(26)-C(31) | 126.8(9) | C(45)-C(44)-C(49) | 113.9(5) |
| C(25)-C(26)-C(31) | 125.3(9) | C(45)-C(44)-B(2)  | 124.4(5) |
| C(22)-C(26)-Zr(2) | 74.7(3)  | C(49)-C(44)-B(2)  | 121.7(5) |
| C(25)-C(26)-Zr(2) | 73.1(4)  | F(12)-C(45)-C(44) | 119.8(5) |
| C(31)-C(26)-Zr(2) | 122.1(4) | F(12)-C(45)-C(46) | 115.8(6) |
| C(44)-B(2)-C(38)  | 111.2(4) | C(44)-C(45)-C(46) | 124.4(6) |
| C(44)-B(2)-C(32)  | 112.8(5) | F(13)-C(46)-C(47) | 119.5(6) |
| C(38)-B(2)-C(32)  | 112.6(5) | F(13)-C(46)-C(45) | 121.1(7) |
| C(37)-C(32)-C(33) | 114.2(6) | C(47)-C(46)-C(45) | 119.4(6) |
| C(37)-C(32)-B(2)  | 126.0(5) | F(14)-C(47)-C(46) | 119.8(7) |
| C(33)-C(32)-B(2)  | 119.7(6) | F(14)-C(47)-C(48) | 120.6(6) |
| F(2)-C(33)-C(34)  | 116.1(6) | C(46)-C(47)-C(48) | 119.6(6) |
| F(2)-C(33)-C(32)  | 119.9(5) | F(15)-C(48)-C(47) | 119.8(6) |
| C(34)-C(33)-C(32) | 123.9(7) | F(15)-C(48)-C(49) | 121.1(7) |
| F(3)-C(34)-C(35)  | 120.7(6) | C(47)-C(48)-C(49) | 119.1(6) |
| F(3)-C(34)-C(33)  | 120.3(7) | F(16)-C(49)-C(48) | 115.8(5) |
| C(35)-C(34)-C(33) | 118.9(6) | F(16)-C(49)-C(44) | 120.6(5) |
| F(4)-C(35)-C(34)  | 119.6(7) | C(48)-C(49)-C(44) | 123.6(6) |
| F(4)-C(35)-C(36)  | 120.3(7) |                   |          |

---

Symmetry transformations used to generate equivalent atoms:

Table S21. Crystal data and structure refinement for  
[( $\mu_3$ -O)( $\mu_2$ -OC<sub>2</sub>H<sub>5</sub>)<sub>3</sub>{(Cp\*Zr(OC<sub>2</sub>H<sub>5</sub>))<sub>2</sub>(BOC<sub>2</sub>H<sub>5</sub>)}][HB(C<sub>6</sub>F<sub>5</sub>)<sub>3</sub>].

---

|                                   |                                                                                               |                       |
|-----------------------------------|-----------------------------------------------------------------------------------------------|-----------------------|
| Empirical formula                 | C <sub>50</sub> H <sub>60</sub> B <sub>2</sub> F <sub>15</sub> O <sub>7</sub> Zr <sub>2</sub> |                       |
| Formula weight                    | 1262.04                                                                                       |                       |
| Temperature                       | 295(2) K                                                                                      |                       |
| Wavelength                        | 0.71073 Å                                                                                     |                       |
| Crystal system                    | Orthorhombic                                                                                  |                       |
| Space group                       | P2(1)2(1)2(1)                                                                                 |                       |
| Unit cell dimensions              | a = 14.6566(5) Å                                                                              | $\alpha = 90^\circ$ . |
|                                   | b = 18.0175(6) Å                                                                              | $\beta = 90^\circ$ .  |
|                                   | c = 20.3699(7) Å                                                                              | $\gamma = 90^\circ$ . |
| Volume                            | 5379.2(3) Å <sup>3</sup>                                                                      |                       |
| Z                                 | 4                                                                                             |                       |
| Density (calculated)              | 1.558 Mg/m <sup>3</sup>                                                                       |                       |
| Absorption coefficient            | 0.488 mm <sup>-1</sup>                                                                        |                       |
| F(000)                            | 2564                                                                                          |                       |
| Crystal size                      | 0.36 x 0.30 x 0.25 mm <sup>3</sup>                                                            |                       |
| Theta range for data collection   | 1.51 to 27.50°.                                                                               |                       |
| Index ranges                      | -18<=h<=19, -23<=k<=23, -26<=l<=26                                                            |                       |
| Reflections collected             | 54149                                                                                         |                       |
| Independent reflections           | 12348 [R(int) = 0.0591]                                                                       |                       |
| Completeness to theta = 27.50°    | 100.0 %                                                                                       |                       |
| Absorption correction             | Semi-empirical from equivalents                                                               |                       |
| Max. and min. transmission        | 0.8877 and 0.8438                                                                             |                       |
| Refinement method                 | Full-matrix least-squares on F <sup>2</sup>                                                   |                       |
| Data / restraints / parameters    | 12348 / 2 / 704                                                                               |                       |
| Goodness-of-fit on F <sup>2</sup> | 1.030                                                                                         |                       |
| Final R indices [I>2sigma(I)]     | R1 = 0.0412, wR2 = 0.0868                                                                     |                       |
| R indices (all data)              | R1 = 0.0481, wR2 = 0.0899                                                                     |                       |
| Absolute structure parameter      | -0.02(2)                                                                                      |                       |
| Largest diff. peak and hole       | 0.590 and -0.294 e.Å <sup>-3</sup>                                                            |                       |

---

Table S22. Atomic coordinates ( $\times 10^4$ ) and equivalent isotropic displacement parameters ( $\text{\AA}^2 \times 10^3$ ) for  $[(\mu_3\text{-O})(\mu_2\text{-OC}_2\text{H}_5)_3\{(\text{Cp}^*\text{Zr}(\text{OC}_2\text{H}_5)_2(\text{BOC}_2\text{H}_5))\}][\text{HB}(\text{C}_6\text{F}_5)_3]$ . U(eq) is defined as one third of the trace of the orthogonalized  $U^{ij}$  tensor.

|       | x       | y        | z       | U(eq) |
|-------|---------|----------|---------|-------|
| Zr(1) | 6515(1) | 9184(1)  | 1384(1) | 21(1) |
| Zr(2) | 8066(1) | 10513(1) | 1691(1) | 21(1) |
| O(1)  | 7721(1) | 9382(1)  | 1932(1) | 20(1) |
| O(2)  | 7306(2) | 10021(1) | 893(1)  | 25(1) |
| O(3)  | 5441(2) | 9777(1)  | 1329(1) | 30(1) |
| O(4)  | 6379(1) | 9183(1)  | 2457(1) | 26(1) |
| O(5)  | 7356(2) | 10319(1) | 2627(1) | 26(1) |
| O(6)  | 7448(2) | 11429(1) | 1540(1) | 34(1) |
| O(7)  | 7769(2) | 9185(1)  | 3139(1) | 27(1) |
| B(1)  | 7334(3) | 9482(2)  | 2583(2) | 24(1) |
| C(1)  | 6910(3) | 10407(2) | 338(2)  | 38(1) |
| C(2)  | 7636(3) | 10697(3) | -112(2) | 63(2) |
| C(3)  | 4578(3) | 10099(3) | 1227(2) | 56(1) |
| C(4)  | 4405(3) | 10745(2) | 1656(3) | 56(1) |
| C(5)  | 5627(3) | 9337(2)  | 2885(2) | 45(1) |
| C(6)  | 5591(4) | 8914(4)  | 3494(3) | 45(2) |
| C(6') | 4892(7) | 8818(6)  | 2865(6) | 47(3) |
| C(7)  | 7221(3) | 10715(2) | 3239(2) | 39(1) |
| C(8)  | 6916(3) | 11487(2) | 3111(2) | 49(1) |
| C(9)  | 7239(3) | 12187(2) | 1433(3) | 60(1) |
| C(10) | 6295(3) | 12333(3) | 1302(3) | 78(2) |
| C(11) | 7881(3) | 8396(2)  | 3164(2) | 37(1) |
| C(12) | 8732(3) | 8189(2)  | 3519(2) | 50(1) |
| C(13) | 6942(3) | 8334(2)  | 464(2)  | 28(1) |
| C(14) | 5980(3) | 8404(2)  | 442(2)  | 29(1) |
| C(15) | 5629(2) | 8075(2)  | 1024(2) | 28(1) |
| C(16) | 6375(2) | 7794(2)  | 1395(2) | 27(1) |
| C(17) | 7186(2) | 7953(2)  | 1049(2) | 25(1) |
| C(18) | 7598(3) | 8547(2)  | -71(2)  | 41(1) |
| C(19) | 5412(3) | 8722(2)  | -104(2) | 41(1) |
| C(20) | 4637(3) | 8000(2)  | 1195(2) | 39(1) |
| C(21) | 6302(3) | 7351(2)  | 2018(2) | 33(1) |
| C(22) | 8149(3) | 7722(2)  | 1226(2) | 36(1) |
| C(23) | 9630(2) | 10373(2) | 1220(2) | 33(1) |
| C(24) | 9655(2) | 9999(2)  | 1836(2) | 36(1) |
| C(25) | 9537(2) | 10531(3) | 2335(2) | 37(1) |
| C(26) | 9448(3) | 11242(2) | 2033(2) | 33(1) |
| C(27) | 9509(2) | 11137(2) | 1349(2) | 30(1) |
| C(28) | 9817(3) | 10031(3) | 563(2)  | 55(1) |
| C(29) | 9857(3) | 9189(2)  | 1933(3) | 63(2) |

Supplementary Material (ESI) for Dalton Transactions  
This journal is (c) The Royal Society of Chemistry 2008

|       |         |          |          |       |
|-------|---------|----------|----------|-------|
| C(30) | 9577(3) | 10370(3) | 3060(2)  | 60(1) |
| C(31) | 9388(3) | 11969(3) | 2384(2)  | 52(1) |
| C(32) | 9551(3) | 11748(2) | 843(2)   | 44(1) |
| B(2)  | 2989(3) | 9766(2)  | 8956(2)  | 29(1) |
| C(33) | 2138(2) | 9280(2)  | 9262(2)  | 26(1) |
| C(34) | 2267(2) | 8850(2)  | 9813(2)  | 30(1) |
| C(35) | 1590(3) | 8442(2)  | 10124(2) | 33(1) |
| C(36) | 722(3)  | 8470(2)  | 9869(2)  | 33(1) |
| C(37) | 553(3)  | 8885(2)  | 9326(2)  | 36(1) |
| C(38) | 1244(2) | 9272(2)  | 9040(2)  | 29(1) |
| C(39) | 3121(3) | 10534(2) | 9390(2)  | 31(1) |
| C(40) | 2420(3) | 10949(2) | 9668(2)  | 36(1) |
| C(41) | 2548(3) | 11568(2) | 10061(2) | 41(1) |
| C(42) | 3417(3) | 11806(2) | 10179(2) | 39(1) |
| C(43) | 4137(3) | 11431(2) | 9902(2)  | 40(1) |
| C(44) | 3972(3) | 10812(2) | 9525(2)  | 33(1) |
| C(45) | 2880(2) | 9922(2)  | 8164(2)  | 29(1) |
| C(46) | 2601(3) | 10573(2) | 7865(2)  | 36(1) |
| C(47) | 2573(3) | 10686(2) | 7195(2)  | 41(1) |
| C(48) | 2816(3) | 10126(3) | 6786(2)  | 40(1) |
| C(49) | 3081(3) | 9454(2)  | 7043(2)  | 35(1) |
| C(50) | 3113(2) | 9371(2)  | 7720(2)  | 30(1) |
| F(1)  | 3108(2) | 8807(1)  | 10091(1) | 42(1) |
| F(2)  | 1765(2) | 8040(1)  | 10664(1) | 49(1) |
| F(3)  | 40(2)   | 8102(1)  | 10178(1) | 49(1) |
| F(4)  | -304(2) | 8927(2)  | 9091(1)  | 54(1) |
| F(5)  | 1012(2) | 9676(1)  | 8505(1)  | 45(1) |
| F(6)  | 1536(2) | 10759(1) | 9554(1)  | 51(1) |
| F(7)  | 1833(2) | 11936(1) | 10310(1) | 63(1) |
| F(8)  | 3567(2) | 12407(1) | 10555(1) | 60(1) |
| F(9)  | 4995(2) | 11660(1) | 10021(1) | 57(1) |
| F(10) | 4727(1) | 10469(1) | 9289(1)  | 43(1) |
| F(11) | 2334(2) | 11154(1) | 8241(1)  | 56(1) |
| F(12) | 2305(2) | 11343(2) | 6951(1)  | 64(1) |
| F(13) | 2797(2) | 10218(2) | 6129(1)  | 59(1) |
| F(14) | 3305(2) | 8894(1)  | 6643(1)  | 55(1) |
| F(15) | 3392(2) | 8704(1)  | 7935(1)  | 44(1) |

---



Table S23. Anisotropic displacement parameters ( $\text{\AA}^2 \times 10^3$ ) for  $[(\mu_3\text{-O})(\mu_2\text{-OC}_2\text{H}_5)_3\{\text{Cp}^*\text{Zr}(\text{OC}_2\text{H}_5)_2(\text{BOC}_2\text{H}_5)\}_2][\text{HB}(\text{C}_6\text{F}_5)_3]$ . The anisotropic displacement factor exponent takes the form:  $-2p^2[h^2 a^*2U^{11} + \dots + 2 h k a^* b^* U^{12}]$

|       | U11   | U22   | U33    | U23    | U13    | U12    |
|-------|-------|-------|--------|--------|--------|--------|
| Zr(1) | 21(1) | 20(1) | 21(1)  | 1(1)   | -1(1)  | -2(1)  |
| Zr(2) | 23(1) | 20(1) | 21(1)  | 1(1)   | -2(1)  | -2(1)  |
| O(1)  | 17(1) | 22(1) | 20(1)  | -1(1)  | 0(1)   | 0(1)   |
| O(2)  | 30(1) | 26(1) | 20(1)  | 5(1)   | -5(1)  | -4(1)  |
| O(3)  | 24(1) | 32(1) | 35(1)  | 2(1)   | -6(1)  | 3(1)   |
| O(4)  | 20(1) | 34(1) | 25(1)  | 4(1)   | 4(1)   | 2(1)   |
| O(5)  | 34(1) | 24(1) | 20(1)  | -5(1)  | -1(1)  | 4(1)   |
| O(6)  | 39(2) | 23(1) | 39(2)  | 4(1)   | -4(1)  | 2(1)   |
| O(7)  | 31(1) | 30(1) | 20(1)  | 5(1)   | -2(1)  | 3(1)   |
| B(1)  | 22(2) | 26(2) | 23(2)  | 1(2)   | 1(2)   | 2(2)   |
| C(1)  | 49(2) | 36(2) | 28(2)  | 12(2)  | -16(2) | -10(2) |
| C(2)  | 73(3) | 79(4) | 39(2)  | 32(3)  | -14(2) | -24(3) |
| C(3)  | 41(3) | 60(3) | 66(3)  | 3(3)   | -15(2) | 16(2)  |
| C(4)  | 39(2) | 42(2) | 87(3)  | 5(3)   | 8(2)   | 13(2)  |
| C(5)  | 38(2) | 51(3) | 46(2)  | 9(2)   | 22(2)  | 12(2)  |
| C(6)  | 38(3) | 65(4) | 33(3)  | 8(3)   | 7(3)   | -2(3)  |
| C(7)  | 54(2) | 36(2) | 26(2)  | -9(2)  | -2(2)  | 12(2)  |
| C(8)  | 76(3) | 34(2) | 37(2)  | -8(2)  | 10(2)  | 14(2)  |
| C(9)  | 47(3) | 24(2) | 110(4) | 21(3)  | -3(3)  | 0(2)   |
| C(10) | 55(3) | 34(2) | 145(6) | 8(3)   | -31(4) | 10(2)  |
| C(11) | 46(2) | 34(2) | 30(2)  | 7(2)   | -4(2)  | -1(2)  |
| C(12) | 49(3) | 45(2) | 57(3)  | 12(2)  | -4(2)  | 14(2)  |
| C(13) | 36(2) | 24(2) | 23(2)  | -4(1)  | 0(2)   | -4(2)  |
| C(14) | 33(2) | 27(2) | 25(2)  | -4(2)  | -2(2)  | -7(2)  |
| C(15) | 28(2) | 24(2) | 32(2)  | -5(2)  | 0(2)   | -4(1)  |
| C(16) | 32(2) | 19(2) | 29(2)  | -5(1)  | -1(2)  | -3(1)  |
| C(17) | 28(2) | 20(2) | 26(2)  | -5(1)  | -3(1)  | -1(1)  |
| C(18) | 53(3) | 40(2) | 30(2)  | -4(2)  | 10(2)  | -2(2)  |
| C(19) | 47(3) | 43(2) | 33(2)  | 3(2)   | -10(2) | -9(2)  |
| C(20) | 30(2) | 36(2) | 52(3)  | -1(2)  | 0(2)   | -12(2) |
| C(21) | 43(2) | 28(2) | 29(2)  | 1(2)   | 1(2)   | -5(2)  |
| C(22) | 35(2) | 32(2) | 40(2)  | -4(2)  | -1(2)  | 3(2)   |
| C(23) | 21(2) | 40(2) | 38(2)  | -3(2)  | 1(2)   | -1(2)  |
| C(24) | 22(2) | 31(2) | 56(3)  | 10(2)  | -9(2)  | -3(2)  |
| C(25) | 23(2) | 55(2) | 33(2)  | 8(2)   | -7(2)  | -14(2) |
| C(26) | 28(2) | 35(2) | 35(2)  | -4(2)  | -1(2)  | -12(2) |
| C(27) | 26(2) | 32(2) | 33(2)  | 3(2)   | 0(2)   | -9(2)  |
| C(28) | 39(3) | 67(3) | 59(3)  | -30(3) | 7(2)   | -3(2)  |
| C(29) | 28(2) | 39(2) | 122(5) | 20(3)  | -8(2)  | 5(2)   |
| C(30) | 37(2) | 98(4) | 47(3)  | 28(3)  | -15(2) | -22(3) |

Supplementary Material (ESI) for Dalton Transactions  
This journal is (c) The Royal Society of Chemistry 2008

|       |       |       |       |        |        |        |
|-------|-------|-------|-------|--------|--------|--------|
| C(31) | 46(3) | 55(3) | 56(3) | -26(2) | 3(2)   | -15(2) |
| C(32) | 40(2) | 45(2) | 48(3) | 12(2)  | 0(2)   | -12(2) |
| B(2)  | 33(2) | 26(2) | 29(2) | -4(2)  | 5(2)   | -3(2)  |
| C(33) | 30(2) | 21(2) | 26(2) | -2(1)  | 2(1)   | 1(1)   |
| C(34) | 24(2) | 38(2) | 29(2) | -9(2)  | -4(2)  | 4(2)   |
| C(35) | 49(2) | 28(2) | 23(2) | 0(1)   | 6(2)   | 5(2)   |
| C(36) | 36(2) | 27(2) | 36(2) | -11(2) | 15(2)  | -7(2)  |
| C(37) | 27(2) | 37(2) | 43(2) | -9(2)  | 1(2)   | 0(2)   |
| C(38) | 30(2) | 26(2) | 32(2) | 0(2)   | -3(2)  | 2(1)   |
| C(39) | 34(2) | 32(2) | 27(2) | 4(2)   | -1(2)  | -3(2)  |
| C(40) | 36(2) | 34(2) | 39(2) | 1(2)   | 5(2)   | -6(2)  |
| C(41) | 58(3) | 30(2) | 36(2) | -2(2)  | 19(2)  | 2(2)   |
| C(42) | 60(3) | 26(2) | 30(2) | -9(2)  | -1(2)  | -3(2)  |
| C(43) | 45(2) | 35(2) | 38(2) | 4(2)   | -9(2)  | -12(2) |
| C(44) | 33(2) | 32(2) | 34(2) | 0(2)   | 4(2)   | 1(2)   |
| C(45) | 26(2) | 30(2) | 31(2) | -3(2)  | 3(1)   | -3(1)  |
| C(46) | 39(2) | 32(2) | 38(2) | -5(2)  | 4(2)   | 3(2)   |
| C(47) | 35(2) | 40(2) | 48(2) | 12(2)  | 1(2)   | 2(2)   |
| C(48) | 29(2) | 64(3) | 27(2) | 7(2)   | 0(2)   | -6(2)  |
| C(49) | 30(2) | 41(2) | 35(2) | -14(2) | 4(2)   | -5(2)  |
| C(50) | 28(2) | 23(2) | 39(2) | 0(1)   | -3(2)  | -3(2)  |
| F(1)  | 33(1) | 60(2) | 34(1) | 6(1)   | -7(1)  | 6(1)   |
| F(2)  | 67(2) | 48(1) | 32(1) | 11(1)  | 6(1)   | 2(1)   |
| F(3)  | 46(1) | 46(1) | 57(2) | -4(1)  | 22(1)  | -13(1) |
| F(4)  | 28(1) | 67(2) | 66(2) | 2(1)   | -6(1)  | -7(1)  |
| F(5)  | 34(1) | 54(2) | 48(1) | 13(1)  | -9(1)  | 2(1)   |
| F(6)  | 37(1) | 43(1) | 75(2) | -11(1) | 9(1)   | 5(1)   |
| F(7)  | 70(2) | 47(2) | 72(2) | -13(1) | 34(2)  | 7(1)   |
| F(8)  | 98(2) | 38(1) | 45(1) | -17(1) | 7(2)   | -16(2) |
| F(9)  | 58(2) | 51(2) | 62(2) | -6(1)  | -16(1) | -13(1) |
| F(10) | 28(1) | 47(1) | 55(1) | -10(1) | 2(1)   | -5(1)  |
| F(11) | 84(2) | 34(1) | 50(2) | -1(1)  | -2(1)  | 24(1)  |
| F(12) | 78(2) | 55(2) | 59(2) | 25(1)  | -5(2)  | 15(2)  |
| F(13) | 61(2) | 86(2) | 29(1) | 11(1)  | 1(1)   | -2(2)  |
| F(14) | 64(2) | 61(2) | 40(1) | -21(1) | 4(1)   | 2(1)   |
| F(15) | 59(2) | 29(1) | 45(1) | -1(1)  | 0(1)   | 4(1)   |

---

Table S24. Hydrogen coordinates ( $\times 10^4$ ) and isotropic displacement parameters ( $\text{\AA}^2 \times 10^3$ ) for  $[(\mu_3\text{-O})(\mu_2\text{-OC}_2\text{H}_5)_3\{(\text{Cp}^*\text{Zr}(\text{OC}_2\text{H}_5))_2(\text{BOC}_2\text{H}_5)\}][\text{HB}(\text{C}_6\text{F}_5)_3]$ .

|        | x    | y     | z    | U(eq) |
|--------|------|-------|------|-------|
| H(1A)  | 6540 | 10816 | 494  | 45    |
| H(1B)  | 6517 | 10070 | 97   | 45    |
| H(2A)  | 7951 | 11100 | 97   | 95    |
| H(2B)  | 7361 | 10870 | -512 | 95    |
| H(2C)  | 8061 | 10308 | -210 | 95    |
| H(3A)  | 4111 | 9727  | 1306 | 67    |
| H(3B)  | 4529 | 10254 | 772  | 67    |
| H(4A)  | 4396 | 10587 | 2106 | 84    |
| H(4B)  | 3828 | 10963 | 1545 | 84    |
| H(4C)  | 4880 | 11106 | 1596 | 84    |
| H(5A)  | 5066 | 9247  | 2645 | 54    |
| H(5B)  | 5642 | 9861  | 2996 | 54    |
| H(5'A) | 5855 | 9360  | 3332 | 54    |
| H(5'B) | 5389 | 9824  | 2777 | 54    |
| H(6A)  | 5066 | 9062  | 3743 | 68    |
| H(6B)  | 6133 | 9007  | 3746 | 68    |
| H(6C)  | 5551 | 8394  | 3395 | 68    |
| H(6'A) | 4423 | 8972  | 3165 | 70    |
| H(6'B) | 5111 | 8336  | 2988 | 70    |
| H(6'C) | 4647 | 8799  | 2429 | 70    |
| H(7A)  | 7788 | 10723 | 3484 | 46    |
| H(7B)  | 6767 | 10460 | 3502 | 46    |
| H(8A)  | 7358 | 11735 | 2842 | 73    |
| H(8B)  | 6853 | 11746 | 3521 | 73    |
| H(8C)  | 6338 | 11478 | 2889 | 73    |
| H(9A)  | 7599 | 12365 | 1066 | 72    |
| H(9B)  | 7421 | 12468 | 1818 | 72    |
| H(10A) | 6136 | 12137 | 879  | 117   |
| H(10B) | 6190 | 12859 | 1306 | 117   |
| H(10C) | 5925 | 12101 | 1633 | 117   |
| H(11A) | 7905 | 8201  | 2720 | 44    |
| H(11B) | 7360 | 8176  | 3383 | 44    |
| H(12A) | 9250 | 8386  | 3290 | 75    |
| H(12B) | 8779 | 7659  | 3542 | 75    |
| H(12C) | 8714 | 8390  | 3956 | 75    |
| H(18A) | 7820 | 8107  | -283 | 61    |
| H(18B) | 8102 | 8815  | 116  | 61    |
| H(18C) | 7292 | 8855  | -386 | 61    |
| H(19A) | 5764 | 9083  | -341 | 61    |
| H(19B) | 4880 | 8956  | 77   | 61    |
| H(19C) | 5230 | 8331  | -396 | 61    |

Supplementary Material (ESI) for Dalton Transactions  
This journal is (c) The Royal Society of Chemistry 2008

|        |       |       |      |    |
|--------|-------|-------|------|----|
| H(20A) | 4389  | 7572  | 978  | 59 |
| H(20B) | 4315  | 8435  | 1054 | 59 |
| H(20C) | 4573  | 7944  | 1661 | 59 |
| H(21A) | 6008  | 7644  | 2349 | 50 |
| H(21B) | 6902  | 7215  | 2164 | 50 |
| H(21C) | 5951  | 6911  | 1937 | 50 |
| H(22A) | 8294  | 7263  | 1009 | 54 |
| H(22B) | 8195  | 7655  | 1692 | 54 |
| H(22C) | 8569  | 8099  | 1088 | 54 |
| H(28A) | 9651  | 10375 | 224  | 83 |
| H(28B) | 9465  | 9585  | 517  | 83 |
| H(28C) | 10454 | 9915  | 528  | 83 |
| H(29A) | 10401 | 9136  | 2190 | 94 |
| H(29B) | 9942  | 8956  | 1513 | 94 |
| H(29C) | 9355  | 8959  | 2157 | 94 |
| H(30A) | 9160  | 9976  | 3163 | 90 |
| H(30B) | 9410  | 10808 | 3300 | 90 |
| H(30C) | 10185 | 10224 | 3177 | 90 |
| H(31A) | 9972  | 12089 | 2570 | 78 |
| H(31B) | 8942  | 11936 | 2727 | 78 |
| H(31C) | 9213  | 12350 | 2079 | 78 |
| H(32A) | 9166  | 12151 | 978  | 66 |
| H(32B) | 9345  | 11562 | 428  | 66 |
| H(32C) | 10168 | 11921 | 803  | 66 |

---

Table S25. Bond lengths [Å] and angles [°] for  
 $[(\mu_3\text{-O})(\mu_2\text{-OC}_2\text{H}_5)_3\{(\text{Cp}^*\text{Zr}(\text{OC}_2\text{H}_5)_2(\text{BOC}_2\text{H}_5)\}_2)]\text{[HB}(\text{C}_6\text{F}_5)_3]$ .

|             |           |             |          |
|-------------|-----------|-------------|----------|
| Zr(1)-O(3)  | 1.906(2)  | C(15)-C(16) | 1.423(5) |
| Zr(1)-O(1)  | 2.120(2)  | C(15)-C(20) | 1.501(5) |
| Zr(1)-O(2)  | 2.149(2)  | C(16)-C(17) | 1.411(5) |
| Zr(1)-O(4)  | 2.194(2)  | C(16)-C(21) | 1.502(5) |
| Zr(1)-C(15) | 2.493(3)  | C(17)-C(22) | 1.515(5) |
| Zr(1)-C(13) | 2.501(3)  | C(23)-C(27) | 1.412(5) |
| Zr(1)-C(14) | 2.505(3)  | C(23)-C(24) | 1.423(5) |
| Zr(1)-C(16) | 2.513(3)  | C(23)-C(28) | 1.498(5) |
| Zr(1)-C(17) | 2.521(3)  | C(24)-C(25) | 1.407(6) |
| Zr(1)-B(1)  | 2.773(4)  | C(24)-C(29) | 1.502(5) |
| Zr(1)-Zr(2) | 3.3608(4) | C(25)-C(26) | 1.427(6) |
| Zr(2)-O(6)  | 1.908(2)  | C(25)-C(30) | 1.506(6) |
| Zr(2)-O(1)  | 2.156(2)  | C(26)-C(27) | 1.410(5) |
| Zr(2)-O(2)  | 2.161(2)  | C(26)-C(31) | 1.495(6) |
| Zr(2)-O(5)  | 2.200(2)  | C(27)-C(32) | 1.509(5) |
| Zr(2)-C(27) | 2.494(3)  | B(2)-C(33)  | 1.646(5) |
| Zr(2)-C(23) | 2.498(4)  | B(2)-C(45)  | 1.646(5) |
| Zr(2)-C(26) | 2.512(4)  | B(2)-C(39)  | 1.653(5) |
| Zr(2)-C(24) | 2.523(4)  | C(33)-C(34) | 1.378(5) |
| Zr(2)-C(25) | 2.523(3)  | C(33)-C(38) | 1.387(5) |
| Zr(2)-B(1)  | 2.811(4)  | C(34)-F(1)  | 1.358(4) |
| O(1)-B(1)   | 1.454(4)  | C(34)-C(35) | 1.387(5) |
| O(2)-C(1)   | 1.449(4)  | C(35)-F(2)  | 1.342(4) |
| O(3)-C(3)   | 1.407(5)  | C(35)-C(36) | 1.375(6) |
| O(4)-C(5)   | 1.433(4)  | C(36)-F(3)  | 1.354(4) |
| O(4)-B(1)   | 1.521(4)  | C(36)-C(37) | 1.358(6) |
| O(5)-C(7)   | 1.450(4)  | C(37)-F(4)  | 1.348(4) |
| O(5)-B(1)   | 1.510(5)  | C(37)-C(38) | 1.360(5) |
| O(6)-C(9)   | 1.417(4)  | C(38)-F(5)  | 1.354(4) |
| O(7)-B(1)   | 1.407(4)  | C(39)-C(44) | 1.371(5) |
| O(7)-C(11)  | 1.431(4)  | C(39)-C(40) | 1.391(5) |
| C(1)-C(2)   | 1.498(6)  | C(40)-F(6)  | 1.361(4) |
| C(3)-C(4)   | 1.478(6)  | C(40)-C(41) | 1.385(6) |
| C(5)-C(6')  | 1.427(8)  | C(41)-F(7)  | 1.341(5) |
| C(5)-C(6)   | 1.457(6)  | C(41)-C(42) | 1.366(6) |
| C(7)-C(8)   | 1.483(5)  | C(42)-F(8)  | 1.343(4) |
| C(9)-C(10)  | 1.434(6)  | C(42)-C(43) | 1.375(6) |
| C(11)-C(12) | 1.490(5)  | C(43)-F(9)  | 1.346(5) |
| C(13)-C(14) | 1.416(5)  | C(43)-C(44) | 1.376(5) |
| C(13)-C(17) | 1.422(5)  | C(44)-F(10) | 1.355(4) |
| C(13)-C(18) | 1.502(5)  | C(45)-C(46) | 1.385(5) |
| C(14)-C(15) | 1.420(5)  | C(45)-C(50) | 1.385(5) |
| C(14)-C(19) | 1.503(5)  | C(46)-F(11) | 1.356(4) |

Supplementary Material (ESI) for Dalton Transactions  
This journal is (c) The Royal Society of Chemistry 2008

|                   |            |                   |            |
|-------------------|------------|-------------------|------------|
| C(46)-C(47)       | 1.380(5)   | C(48)-C(49)       | 1.374(6)   |
| C(47)-F(12)       | 1.344(5)   | C(49)-F(14)       | 1.339(4)   |
| C(47)-C(48)       | 1.357(6)   | C(49)-C(50)       | 1.388(5)   |
| C(48)-F(13)       | 1.349(4)   | C(50)-F(15)       | 1.343(4)   |
| O(3)-Zr(1)-O(1)   | 128.71(9)  | C(13)-Zr(1)-B(1)  | 132.12(12) |
| O(3)-Zr(1)-O(2)   | 91.40(10)  | C(14)-Zr(1)-B(1)  | 156.75(12) |
| O(1)-Zr(1)-O(2)   | 71.16(8)   | C(16)-Zr(1)-B(1)  | 102.78(12) |
| O(3)-Zr(1)-O(4)   | 89.10(10)  | C(17)-Zr(1)-B(1)  | 103.91(11) |
| O(1)-Zr(1)-O(4)   | 63.38(8)   | O(3)-Zr(1)-Zr(2)  | 99.81(7)   |
| O(2)-Zr(1)-O(4)   | 120.85(9)  | O(1)-Zr(1)-Zr(2)  | 38.57(6)   |
| O(3)-Zr(1)-C(15)  | 90.07(11)  | O(2)-Zr(1)-Zr(2)  | 38.89(6)   |
| O(1)-Zr(1)-C(15)  | 136.40(10) | O(4)-Zr(1)-Zr(2)  | 82.91(6)   |
| O(2)-Zr(1)-C(15)  | 134.91(10) | C(15)-Zr(1)-Zr(2) | 167.98(8)  |
| O(4)-Zr(1)-C(15)  | 104.22(11) | C(13)-Zr(1)-Zr(2) | 113.99(9)  |
| O(3)-Zr(1)-C(13)  | 120.36(12) | C(14)-Zr(1)-Zr(2) | 138.97(8)  |
| O(1)-Zr(1)-C(13)  | 106.81(11) | C(16)-Zr(1)-Zr(2) | 139.81(8)  |
| O(2)-Zr(1)-C(13)  | 86.89(10)  | C(17)-Zr(1)-Zr(2) | 114.45(8)  |
| O(4)-Zr(1)-C(13)  | 140.29(10) | B(1)-Zr(1)-Zr(2)  | 53.51(8)   |
| C(15)-Zr(1)-C(13) | 54.46(12)  | O(6)-Zr(2)-O(1)   | 137.97(9)  |
| O(3)-Zr(1)-C(14)  | 90.60(12)  | O(6)-Zr(2)-O(2)   | 89.32(10)  |
| O(1)-Zr(1)-C(14)  | 139.35(11) | O(1)-Zr(2)-O(2)   | 70.25(8)   |
| O(2)-Zr(1)-C(14)  | 101.91(10) | O(6)-Zr(2)-O(5)   | 93.06(10)  |
| O(4)-Zr(1)-C(14)  | 137.24(10) | O(1)-Zr(2)-O(5)   | 62.71(8)   |
| C(15)-Zr(1)-C(14) | 33.01(12)  | O(2)-Zr(2)-O(5)   | 110.01(9)  |
| C(13)-Zr(1)-C(14) | 32.87(12)  | O(6)-Zr(2)-C(27)  | 88.14(11)  |
| O(3)-Zr(1)-C(16)  | 119.44(11) | O(1)-Zr(2)-C(27)  | 133.50(10) |
| O(1)-Zr(1)-C(16)  | 103.39(10) | O(2)-Zr(2)-C(27)  | 114.29(11) |
| O(2)-Zr(1)-C(16)  | 138.37(10) | O(5)-Zr(2)-C(27)  | 135.70(11) |
| O(4)-Zr(1)-C(16)  | 89.07(10)  | O(6)-Zr(2)-C(23)  | 117.47(12) |
| C(15)-Zr(1)-C(16) | 33.01(11)  | O(1)-Zr(2)-C(23)  | 101.94(11) |
| C(13)-Zr(1)-C(16) | 54.30(11)  | O(2)-Zr(2)-C(23)  | 98.21(11)  |
| C(14)-Zr(1)-C(16) | 54.65(11)  | O(5)-Zr(2)-C(23)  | 138.68(11) |
| O(3)-Zr(1)-C(17)  | 143.06(11) | C(27)-Zr(2)-C(23) | 32.87(12)  |
| O(1)-Zr(1)-C(17)  | 88.04(9)   | O(6)-Zr(2)-C(26)  | 88.59(12)  |
| O(2)-Zr(1)-C(17)  | 106.34(10) | O(1)-Zr(2)-C(26)  | 128.36(11) |
| O(4)-Zr(1)-C(17)  | 107.74(10) | O(2)-Zr(2)-C(26)  | 146.98(11) |
| C(15)-Zr(1)-C(17) | 54.42(11)  | O(5)-Zr(2)-C(26)  | 103.00(11) |
| C(13)-Zr(1)-C(17) | 32.90(11)  | C(27)-Zr(2)-C(26) | 32.71(12)  |
| C(14)-Zr(1)-C(17) | 54.59(11)  | C(23)-Zr(2)-C(26) | 54.52(12)  |
| C(16)-Zr(1)-C(17) | 32.54(11)  | O(6)-Zr(2)-C(24)  | 140.75(11) |
| O(3)-Zr(1)-B(1)   | 107.52(11) | O(1)-Zr(2)-C(24)  | 81.01(10)  |
| O(1)-Zr(1)-B(1)   | 31.07(9)   | O(2)-Zr(2)-C(24)  | 114.40(12) |
| O(2)-Zr(1)-B(1)   | 92.31(10)  | O(5)-Zr(2)-C(24)  | 106.12(11) |
| O(4)-Zr(1)-B(1)   | 33.14(10)  | C(27)-Zr(2)-C(24) | 54.22(12)  |
| C(15)-Zr(1)-B(1)  | 129.80(12) | C(23)-Zr(2)-C(24) | 32.91(12)  |

Supplementary Material (ESI) for Dalton Transactions  
This journal is (c) The Royal Society of Chemistry 2008

|                   |            |                   |           |
|-------------------|------------|-------------------|-----------|
| C(26)-Zr(2)-C(24) | 54.23(13)  | O(7)-B(1)-O(4)    | 114.7(3)  |
| O(6)-Zr(2)-C(25)  | 118.61(13) | O(1)-B(1)-O(4)    | 99.3(3)   |
| O(1)-Zr(2)-C(25)  | 95.43(11)  | O(5)-B(1)-O(4)    | 112.5(3)  |
| O(2)-Zr(2)-C(25)  | 146.77(12) | O(7)-B(1)-Zr(1)   | 146.3(3)  |
| O(5)-Zr(2)-C(25)  | 87.51(10)  | O(1)-B(1)-Zr(1)   | 48.79(14) |
| C(27)-Zr(2)-C(25) | 54.22(12)  | O(5)-B(1)-Zr(1)   | 104.8(2)  |
| C(23)-Zr(2)-C(25) | 54.30(12)  | O(4)-B(1)-Zr(1)   | 52.04(14) |
| C(26)-Zr(2)-C(25) | 32.94(13)  | O(7)-B(1)-Zr(2)   | 126.8(2)  |
| C(24)-Zr(2)-C(25) | 32.38(13)  | O(1)-B(1)-Zr(2)   | 48.97(15) |
| O(6)-Zr(2)-B(1)   | 119.67(11) | O(5)-B(1)-Zr(2)   | 51.00(15) |
| O(1)-Zr(2)-B(1)   | 30.57(10)  | O(4)-B(1)-Zr(2)   | 118.4(2)  |
| O(2)-Zr(2)-B(1)   | 91.04(10)  | Zr(1)-B(1)-Zr(2)  | 74.00(9)  |
| O(5)-Zr(2)-B(1)   | 32.24(10)  | O(2)-C(1)-C(2)    | 111.2(3)  |
| C(27)-Zr(2)-B(1)  | 143.34(12) | O(3)-C(3)-C(4)    | 113.0(4)  |
| C(23)-Zr(2)-B(1)  | 122.11(12) | C(6')-C(5)-O(4)   | 115.9(6)  |
| C(26)-Zr(2)-B(1)  | 118.32(12) | C(6')-C(5)-C(6)   | 69.8(6)   |
| C(24)-Zr(2)-B(1)  | 91.99(12)  | O(4)-C(5)-C(6)    | 116.4(4)  |
| C(25)-Zr(2)-B(1)  | 89.95(12)  | O(5)-C(7)-C(8)    | 110.6(3)  |
| O(6)-Zr(2)-Zr(1)  | 105.38(7)  | O(6)-C(9)-C(10)   | 114.5(4)  |
| O(1)-Zr(2)-Zr(1)  | 37.80(6)   | O(7)-C(11)-C(12)  | 111.2(3)  |
| O(2)-Zr(2)-Zr(1)  | 38.64(6)   | C(14)-C(13)-C(17) | 108.6(3)  |
| O(5)-Zr(2)-Zr(1)  | 74.19(6)   | C(14)-C(13)-C(18) | 126.4(3)  |
| C(27)-Zr(2)-Zr(1) | 147.38(9)  | C(17)-C(13)-C(18) | 124.8(4)  |
| C(23)-Zr(2)-Zr(1) | 118.49(9)  | C(14)-C(13)-Zr(1) | 73.7(2)   |
| C(26)-Zr(2)-Zr(1) | 165.80(9)  | C(17)-C(13)-Zr(1) | 74.31(19) |
| C(24)-Zr(2)-Zr(1) | 112.62(9)  | C(18)-C(13)-Zr(1) | 123.2(2)  |
| C(25)-Zr(2)-Zr(1) | 133.13(10) | C(13)-C(14)-C(15) | 107.4(3)  |
| B(1)-Zr(2)-Zr(1)  | 52.49(8)   | C(13)-C(14)-C(19) | 127.4(3)  |
| B(1)-O(1)-Zr(1)   | 100.14(18) | C(15)-C(14)-C(19) | 125.1(3)  |
| B(1)-O(1)-Zr(2)   | 100.5(2)   | C(13)-C(14)-Zr(1) | 73.4(2)   |
| Zr(1)-O(1)-Zr(2)  | 103.62(9)  | C(15)-C(14)-Zr(1) | 73.1(2)   |
| C(1)-O(2)-Zr(1)   | 119.0(2)   | C(19)-C(14)-Zr(1) | 121.7(3)  |
| C(1)-O(2)-Zr(2)   | 126.7(2)   | C(14)-C(15)-C(16) | 108.3(3)  |
| Zr(1)-O(2)-Zr(2)  | 102.47(9)  | C(14)-C(15)-C(20) | 125.6(3)  |
| C(3)-O(3)-Zr(1)   | 169.3(3)   | C(16)-C(15)-C(20) | 126.1(3)  |
| C(5)-O(4)-B(1)    | 122.5(3)   | C(14)-C(15)-Zr(1) | 73.93(19) |
| C(5)-O(4)-Zr(1)   | 132.5(2)   | C(16)-C(15)-Zr(1) | 74.27(18) |
| B(1)-O(4)-Zr(1)   | 94.82(17)  | C(20)-C(15)-Zr(1) | 120.6(2)  |
| C(7)-O(5)-B(1)    | 122.7(3)   | C(17)-C(16)-C(15) | 108.1(3)  |
| C(7)-O(5)-Zr(2)   | 136.9(2)   | C(17)-C(16)-C(21) | 126.1(3)  |
| B(1)-O(5)-Zr(2)   | 96.76(18)  | C(15)-C(16)-C(21) | 125.7(3)  |
| C(9)-O(6)-Zr(2)   | 164.1(3)   | C(17)-C(16)-Zr(1) | 74.01(18) |
| B(1)-O(7)-C(11)   | 117.3(3)   | C(15)-C(16)-Zr(1) | 72.72(19) |
| O(7)-B(1)-O(1)    | 120.7(3)   | C(21)-C(16)-Zr(1) | 122.8(2)  |
| O(7)-B(1)-O(5)    | 108.8(3)   | C(16)-C(17)-C(13) | 107.8(3)  |
| O(1)-B(1)-O(5)    | 99.8(3)    | C(16)-C(17)-C(22) | 127.6(3)  |

Supplementary Material (ESI) for Dalton Transactions  
This journal is (c) The Royal Society of Chemistry 2008

|                   |           |                   |          |
|-------------------|-----------|-------------------|----------|
| C(13)-C(17)-C(22) | 124.5(3)  | F(3)-C(36)-C(37)  | 120.9(4) |
| C(16)-C(17)-Zr(1) | 73.44(19) | F(3)-C(36)-C(35)  | 119.3(4) |
| C(13)-C(17)-Zr(1) | 72.79(19) | C(37)-C(36)-C(35) | 119.7(3) |
| C(22)-C(17)-Zr(1) | 122.7(2)  | F(4)-C(37)-C(36)  | 119.4(4) |
| C(27)-C(23)-C(24) | 107.5(3)  | F(4)-C(37)-C(38)  | 120.8(4) |
| C(27)-C(23)-C(28) | 126.0(4)  | C(36)-C(37)-C(38) | 119.8(4) |
| C(24)-C(23)-C(28) | 126.1(4)  | F(5)-C(38)-C(37)  | 115.7(3) |
| C(27)-C(23)-Zr(2) | 73.4(2)   | F(5)-C(38)-C(33)  | 119.6(3) |
| C(24)-C(23)-Zr(2) | 74.5(2)   | C(37)-C(38)-C(33) | 124.7(3) |
| C(28)-C(23)-Zr(2) | 123.5(3)  | C(44)-C(39)-C(40) | 113.2(3) |
| C(25)-C(24)-C(23) | 108.2(3)  | C(44)-C(39)-B(2)  | 121.3(3) |
| C(25)-C(24)-C(29) | 126.2(4)  | C(40)-C(39)-B(2)  | 125.5(3) |
| C(23)-C(24)-C(29) | 125.5(4)  | F(6)-C(40)-C(41)  | 115.5(4) |
| C(25)-C(24)-Zr(2) | 73.8(2)   | F(6)-C(40)-C(39)  | 120.0(3) |
| C(23)-C(24)-Zr(2) | 72.6(2)   | C(41)-C(40)-C(39) | 124.6(4) |
| C(29)-C(24)-Zr(2) | 123.6(3)  | F(7)-C(41)-C(42)  | 120.5(4) |
| C(24)-C(25)-C(26) | 108.1(3)  | F(7)-C(41)-C(40)  | 120.7(4) |
| C(24)-C(25)-C(30) | 125.0(4)  | C(42)-C(41)-C(40) | 118.8(4) |
| C(26)-C(25)-C(30) | 126.7(4)  | F(8)-C(42)-C(41)  | 120.5(4) |
| C(24)-C(25)-Zr(2) | 73.8(2)   | F(8)-C(42)-C(43)  | 120.3(4) |
| C(26)-C(25)-Zr(2) | 73.1(2)   | C(41)-C(42)-C(43) | 119.2(3) |
| C(30)-C(25)-Zr(2) | 122.6(3)  | F(9)-C(43)-C(42)  | 119.5(4) |
| C(27)-C(26)-C(25) | 107.4(3)  | F(9)-C(43)-C(44)  | 120.9(4) |
| C(27)-C(26)-C(31) | 126.5(4)  | C(42)-C(43)-C(44) | 119.6(4) |
| C(25)-C(26)-C(31) | 125.9(4)  | F(10)-C(44)-C(39) | 120.3(3) |
| C(27)-C(26)-Zr(2) | 73.0(2)   | F(10)-C(44)-C(43) | 115.1(3) |
| C(25)-C(26)-Zr(2) | 74.0(2)   | C(39)-C(44)-C(43) | 124.6(4) |
| C(31)-C(26)-Zr(2) | 122.9(3)  | C(46)-C(45)-C(50) | 113.1(3) |
| C(26)-C(27)-C(23) | 108.8(3)  | C(46)-C(45)-B(2)  | 127.2(3) |
| C(26)-C(27)-C(32) | 125.3(4)  | C(50)-C(45)-B(2)  | 119.6(3) |
| C(23)-C(27)-C(32) | 125.5(4)  | F(11)-C(46)-C(47) | 115.9(3) |
| C(26)-C(27)-Zr(2) | 74.3(2)   | F(11)-C(46)-C(45) | 119.4(3) |
| C(23)-C(27)-Zr(2) | 73.7(2)   | C(47)-C(46)-C(45) | 124.7(4) |
| C(32)-C(27)-Zr(2) | 123.7(3)  | F(12)-C(47)-C(48) | 120.3(4) |
| C(33)-B(2)-C(45)  | 112.8(3)  | F(12)-C(47)-C(46) | 120.3(4) |
| C(33)-B(2)-C(39)  | 109.4(3)  | C(48)-C(47)-C(46) | 119.4(4) |
| C(45)-B(2)-C(39)  | 113.1(3)  | F(13)-C(48)-C(47) | 120.9(4) |
| C(34)-C(33)-C(38) | 112.9(3)  | F(13)-C(48)-C(49) | 119.5(4) |
| C(34)-C(33)-B(2)  | 120.2(3)  | C(47)-C(48)-C(49) | 119.6(3) |
| C(38)-C(33)-B(2)  | 126.8(3)  | F(14)-C(49)-C(48) | 120.1(3) |
| F(1)-C(34)-C(33)  | 119.7(3)  | F(14)-C(49)-C(50) | 121.0(4) |
| F(1)-C(34)-C(35)  | 115.4(3)  | C(48)-C(49)-C(50) | 118.9(3) |
| C(33)-C(34)-C(35) | 124.9(3)  | F(15)-C(50)-C(45) | 120.2(3) |
| F(2)-C(35)-C(36)  | 120.4(4)  | F(15)-C(50)-C(49) | 115.5(3) |
| F(2)-C(35)-C(34)  | 121.6(4)  | C(45)-C(50)-C(49) | 124.3(3) |
| C(36)-C(35)-C(34) | 118.1(3)  |                   |          |



---

Symmetry transformations used to generate equivalent atoms:

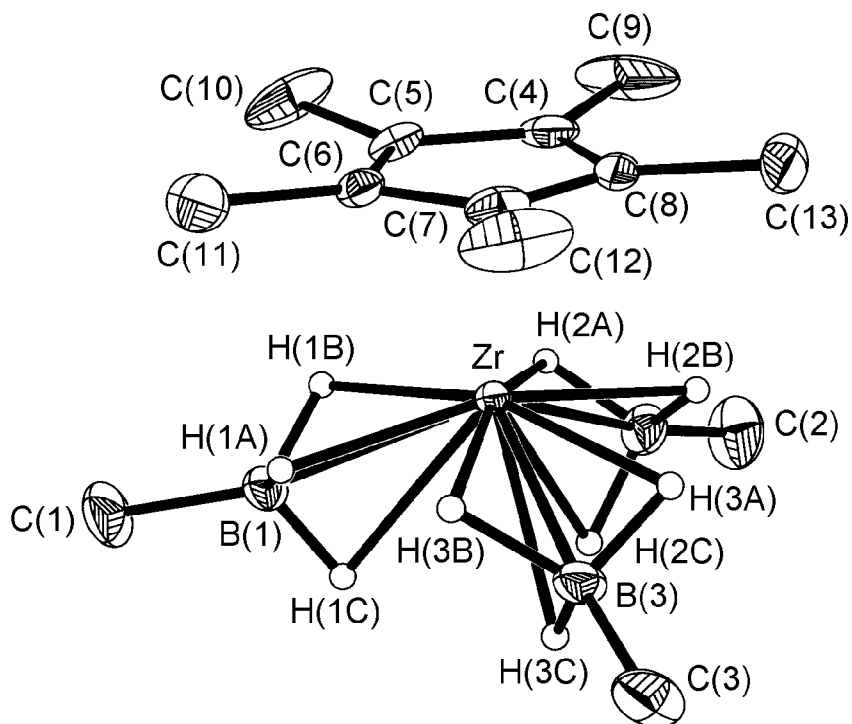

Figure S1. Molecular structure of Cp\*Zr(BH<sub>3</sub>CH<sub>3</sub>)<sub>3</sub>, showing 30% probability thermal ellipsoids.

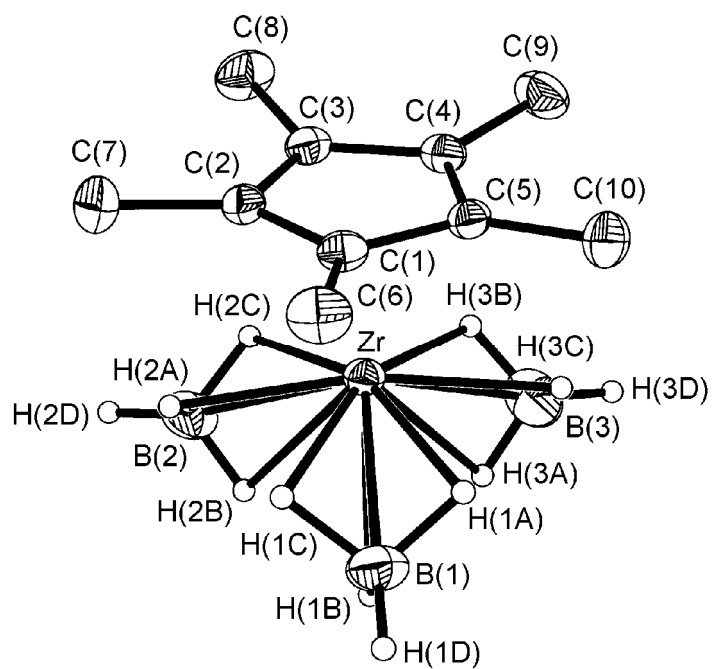

Figure S2. Molecular structure of Cp\*Zr(BH<sub>4</sub>)<sub>3</sub>, showing 50% probability thermal ellipsoids.
